# The JAK2-STAT3 pathway controls a beneficial proteostasis response of reactive astrocytes in Huntington's disease

Abjean L.<sup>1</sup>, Ben Haim L.<sup>1\*</sup>, Riquelme-Perez M.<sup>1,2\*</sup>, Gipchtein P.<sup>1</sup>, Derbois C.<sup>2</sup>, Palomares M.A.<sup>2</sup>, Petit F.<sup>1</sup>, Hérard A.S.<sup>1</sup>, Gaillard M.C.<sup>1</sup>, Guillermier M.<sup>1</sup>, Gaudin-Guérif M.<sup>1</sup>, Sagar N.<sup>1</sup>, Dufour N.<sup>1</sup>, Robil N.<sup>3</sup>, Kabani M.<sup>1</sup>, Melki R.<sup>1</sup>, De la Grange P.<sup>3</sup>, Bemelmans A.P.<sup>1</sup>, Bonvento G.<sup>1</sup>, Deleuze J.F.<sup>2</sup>, Hantraye P.<sup>1</sup>, Bonnet E.<sup>2</sup>, Brohard S.<sup>2</sup>, Olaso R.<sup>2</sup>, Brouillet E.<sup>1</sup>, Carrillo-de Sauvage M.A.<sup>1</sup>, Escartin C.<sup>1</sup>

<sup>1</sup> Université Paris-Saclay, Commissariat à l'Energie Atomique et aux Energies Alternatives, Centre National de la Recherche Scientifique, MIRCen, Laboratoire des Maladies Neurodégénératives, 92265, Fontenay-aux-Roses, France.

<sup>2</sup> Université Paris-Saclay, Commissariat à l'Energie Atomique et aux Energies Alternatives, Centre National de Recherche en Génomique Humaine, 91057, Evry, France.

<sup>3</sup> GenoSplice technology, 75013 Paris, France

\*Equal contribution

## Short title

STAT3-mediated proteostasis in HD astrocytes

## Key words

Huntington's disease/ JAK2-STAT3 pathway/ Proteostasis/ Reactive astrocytes/ Viral vectors

## Corresponding author

Carole Escartin, Ph.D.

UMR9199 - MIRCen

CNRS - CEA - Université Paris Saclay

18, route du Panorama

92260 Fontenay-aux-roses

[carole.escartin@cea.fr](mailto:carole.escartin@cea.fr)

**Competitive interests:** The authors declare no competing interests.

## 1 **Abstract**

2

3       Huntington's disease (HD) is a fatal neurodegenerative disease characterized by striatal  
4 neurodegeneration, aggregation of mutant Huntingtin (mHTT) and the presence of reactive astrocytes.  
5 Astrocytes are important partners for neurons and engage in a specific reactive response in HD that  
6 involves morphological, molecular and functional changes. How reactive astrocytes contribute to HD is  
7 still an open question, especially because their reactive state is poorly reproduced in mouse models.

8       Here, we show that the JAK2-STAT3 pathway, a central cascade controlling the reactive response  
9 of astrocytes, is activated in the putamen of HD patients. Selective activation of this cascade in astrocytes  
10 reduces the number and size of neuronal mHTT aggregates and improves neuronal features in two HD  
11 mouse models. Moreover, activation of the JAK2-STAT3 pathway in astrocytes coordinates a  
12 transcriptional program that increases their intrinsic proteolytic capacity, through the lysosomes and the  
13 ubiquitin-proteasome system, and enhances their production of the co-chaperone DNAJB1, which is  
14 released in exosomes.

15       Together, our results show that the JAK2-STAT3 pathway controls a beneficial proteostasis response  
16 in reactive astrocytes in HD, which involves bi-directional signalling with neurons to reduce mHTT  
17 aggregation and toxicity.

18

## 19 Introduction

20 Huntington's disease (HD) is a genetic neurodegenerative disease that causes involuntary  
21 movements, psychiatric symptoms and cognitive deficits, with no curative treatment yet available<sup>1</sup>. HD  
22 is due to the expansion of CAG triplet repeats in the *Huntingtin (HTT)* gene, leading to a polyglutamine  
23 tract in the N-terminal part of the protein HTT<sup>2</sup>. Both loss and gain of function of HTT contribute to the  
24 dysfunction and death of projection neurons in the caudate/putamen (striatum in mice) and cerebral  
25 cortex. A key neuropathological hallmark of HD is the presence of mutant HTT (mHTT) aggregates,  
26 primarily in neurons<sup>3</sup>, but also in glial cells<sup>4,5</sup>. The brain of HD patients also displays reactive astrocytes,  
27 initially characterized by their hypertrophic morphology and overexpression of Glial Fibrillary Acidic  
28 Protein (GFAP)<sup>6-8</sup>. Astrocytes also display significant changes in gene expression in the putamen<sup>9</sup> and  
29 cortex<sup>5</sup> of HD patients. Astrocytes are essential partners of neurons, as they perform many key functions  
30 including metabolic and trophic support, antioxidant defence and regulation of synaptic transmission  
31 and plasticity<sup>10</sup>. How are these functions changed in the HD brain? Most studies report defective  
32 astrocyte functions in HD models<sup>11</sup>, including reduced glutamate uptake<sup>12</sup>, altered K<sup>+</sup> buffering<sup>13</sup>,  
33 impaired regulation of blood flow<sup>14</sup>, as well as reduced synthesis and release of antioxidants<sup>15</sup>, trophic  
34 factors<sup>16</sup>, gliotransmitters<sup>17</sup> and exosomes<sup>18</sup>. However, in most cases, HD mouse models poorly replicate  
35 the reactive state of astrocytes observed in HD human brains, based on GFAP overexpression,  
36 hypertrophy<sup>11, 13</sup> and transcriptional profile, as assessed recently with genome-wide transcriptomics<sup>9, 19</sup>.  
37 <sup>20</sup>. Therefore, the impact of reactive astrocytes on disease progression is still unclear.

38 The Janus Kinase (JAK)-Signal Transducer and Activator of Transcription 3 (STAT3) pathway is a  
39 central pathway controlling astrocyte reactive response<sup>21</sup>. STAT3 is found activated in reactive  
40 astrocytes in genetic models of HD in mice and non-human primates<sup>22</sup>, but it is still unknown whether  
41 this pathway is also activated in reactive astrocytes found in HD patients and which astrocyte functions  
42 are regulated by this pathway.

43 We previously reported that inhibition of the JAK2-STAT3 pathway in reactive astrocytes in an acute  
44 model of HD reduces their reactive features and increases the number of mHTT aggregates<sup>22</sup>. mHTT  
45 aggregates are mainly composed of N-terminal fragments of mHTT, which trap several important  
46 proteins such as transcription factors or chaperones<sup>23, 24</sup> and generate deleterious steric hindrance.  
47 However, aggregates may also contribute to remove toxic soluble mHTT from the cytosol<sup>25</sup>. Soluble  
48 mHTT can be degraded by the ubiquitin-proteasome system (UPS), while aggregates can only be cleared  
49 by autophagy coupled to lysosomal degradation<sup>26, 27</sup>. Astrocytes are reported to have high proteolytic  
50 capacity, including for mHTT, which could explain why fewer aggregates are found in astrocytes than  
51 in neurons<sup>28, 29</sup>. Yet, it is unknown whether the UPS and autophagy/lysosomes systems are specifically  
52 altered in HD astrocytes<sup>30, 31</sup>, and how these systems can be stimulated in astrocytes to promote mHTT  
53 clearance. Another important proteostasis mechanism preventing mHTT aggregation is operated by  
54 chaperones, which promote HTT proper folding, prevent abnormal interactions with cellular proteins

55 and guide mHTT to degradation systems<sup>32, 33</sup>. In particular, Heat Shock Proteins (HSP) prevent mHTT  
56 aggregation in different cell types<sup>32, 34</sup>.

57 Here, we studied how the JAK2-STAT3 pathway controls the reactive response of astrocytes in HD,  
58 focusing on their ability to promote cellular proteostasis. We observed STAT3 activation in reactive  
59 astrocytes in the brain of HD patients. In two HD mouse models, we found that activation of the JAK2-  
60 STAT3 pathway in reactive astrocytes reduces both the number and size of mHTT aggregates in  
61 neurons, without increasing soluble mHTT levels. Genome-wide transcriptomics and functional analysis  
62 showed that JAK2-STAT3 pathway activation induces a specific proteostasis signature in astrocytes  
63 associated with higher proteolytic activity. It also induces astrocyte expression of the co-chaperone  
64 DNAJB1, which is loaded in exosomes and reduces mHTT aggregation in neurons. Our results show  
65 that the JAK2-STAT3 pathway controls a bi-directional communication between reactive astrocytes and  
66 neurons in HD, which eventually reduces mHTT aggregation and improves neuronal alterations.

67

## 68 **Material and methods**

69

### 70 **Mice.**

71 Heterozygous knock-in mice (Hdh140 mice) expressing a chimeric mouse/human exon 1 containing  
72 140 CAG repeats inserted into the murine *Htt* gene on a C57BL/6J background were originally obtained  
73 from Jackson (stock # 027409)<sup>35</sup>. Male and female Hdh140 mice and their control littermates were  
74 injected with different viral vectors (see below) at 7-10 months and euthanized 4 months later. Wild  
75 type (WT), adult male C57BL/6J mice were injected at 10 weeks of age, with different viral vectors and  
76 euthanized 6 weeks later.

77 All experimental protocols were reviewed and approved by the local ethics committee (CETEA  
78 N°44) and the French Ministry of Education and Research (Approval APAFIS#4554-  
79 2016031709173407). They were performed in an authorized animal facility (authorization #D92-032-  
80 02), in strict accordance with recommendations of the European Union (2010-63/EEC), and in  
81 compliance with the 3R guidelines. Animal care was supervised by a dedicated veterinarian and animal  
82 technicians. Mice were housed under standard environmental conditions (12-hour light-dark cycle,  
83 temperature:  $22 \pm 1^\circ\text{C}$  and humidity: 50%) with *ad libitum* access to food and water.

84

### 85 **Viral vectors.**

86 We either used lentiviral vectors (LV) or adeno-associated vectors (AAV) to drive transgene  
87 expression in neurons or in astrocytes, as described in each figure.

88 Self-inactivated (SIN) LV were produced by transient co-transfection of 293T cells with four  
89 plasmids encoding viral structural proteins, the envelope protein and the transgenic cDNA under the  
90 control of a phosphoglycerate kinase 1 promoter (PGK1) and followed by the woodchuck hepatitis virus  
91 post-transcriptional regulatory Element (WPRE), to enhance transgene expression<sup>36</sup>. To target neurons,  
92 LV were pseudotyped with the G-protein of the vesicular stomatitis virus<sup>37</sup>. To target astrocytes, LV  
93 were pseudotyped with the rabies-related Mokola envelope and lentiviral recombinant genome  
94 contained four repeats of the miR124 target to repress transgene expression in neurons<sup>36</sup>. LV are referred  
95 to as “LV<sub>A</sub>- or LV<sub>N</sub>-name of the transgene” depending the cell type targeted: A for astrocytes and N for  
96 neurons. Lentiviral particle titers were determined by ELISA quantification of the nucleocapsid p24  
97 protein.

98 AAV (AAV2, serotype 9) contain the gfaABC1D promoter, a synthetic promoter derived from the  
99 GFAP promoter<sup>38</sup>, and transduce astrocytes. AAV were produced according to validated procedures<sup>39</sup>.  
100 Viral genome concentration was determined by qPCR on DNase resistant particles.

101 Viral vectors encoding murine SOCS3 or JAK2<sup>T875N</sup>, a constitutively active form of JAK2 (JAK2ca),  
102 were used to respectively, inhibit or activate the JAK2-STAT3 pathway in mouse astrocytes<sup>22, 39, 40</sup>. They  
103 were co-injected with a viral vector encoding GFP or Td-Tomato to visualize transduced cells (same

104 total viral load). Depending on the experiment, bilateral injections with the same viral vector were  
105 performed and controls were generated in different mice or the contralateral striatum was injected with  
106 the control viral vector encoding GFP only and data were analysed with paired statistical tests.

107 LV encoding the first 171 N-terminal amino acids of human *Huntingtin* (*HTT*) cDNA with 82  
108 polyglutamine repeats and that target either striatal neurons [LV<sub>N</sub>-mHTT<sup>41</sup>] or astrocytes [LV<sub>A</sub>-mHTT<sup>8</sup>]  
109 were used as LV-based models of HD.

110 Last, we generated LV<sub>A</sub> expressing full-length human *DNAJB1* (LV<sub>A</sub>-DNAJB1) or the dominant  
111 negative mutant corresponding to the J-domain of human *DNAJB1*<sup>42</sup> [LV<sub>A</sub>-DNAJB1-DN]. The initial  
112 cDNA was generated by GeneArt Gene Synthesis services (Invitrogen, Carlsbad, CA) based on  
113 published sequences, and inserted into a pENTR<sup>®</sup> transfer plasmid. Gateway<sup>®</sup> recombination  
114 (ThermoFisher Scientific) was used to clone these cDNA into appropriate SIN expression plasmid  
115 containing the PGK1 promoter, WPRE and four miR124 target sequences.

116

### 117 **Stereotactic injections.**

118 WT mice were anesthetized with an *i.p.* injection of ketamine (100 mg/kg) and xylazine (10 mg/kg).  
119 For Hdh140 mice, xylazine was replaced by medetomidine (0.25 mg/kg) and anaesthesia was reversed  
120 by a *s.c.* injection of atipamezole (0.25 mg/kg) at the end of the surgical procedure. Lidocaine (7 mg/kg)  
121 was injected subcutaneously at the incision site, 10 min prior to surgery. Mice were given paracetamol  
122 (1.6 mg/ml) in drinking water for 48 h after surgery. Viral vectors were injected in the striatum  
123 (coordinates from Bregma: anteroposterior: + 1 mm, lateral: +/- 2 mm; ventral: - 2.5 mm from the dura,  
124 with the tooth bar set at 0.0 mm). LV were diluted in phosphate buffer saline (PBS) with 1% bovine  
125 serum albumin (BSA), at a total final concentration of 100 ng p24/μl. AAV were diluted in 0.1 M PBS  
126 with 0.001% pluronic acid, at a final total concentration of 2.5 \* 10<sup>9</sup> viral genome (VG)/μl. Diluted viral  
127 suspensions (2-3 μl depending on the cohort) were injected at a rate of 0.2 - 0.25 μl/min with a pump.

128

### 129 **Immunohistology.**

130 Mice were either killed with an overdose of sodium pentobarbital (180 mg/kg) and perfused with 4%  
131 paraformaldehyde (PFA) or by cervical dislocation and one brain hemisphere was rapidly dissected and  
132 drop-fixed in 4% PFA. Brains were post-fixed for 24h in 4% PFA, cryoprotected in 30% sucrose solution  
133 and cut on a freezing microtome into 30 μm-thick coronal sections. Series of brain sections were stored  
134 at -20°C in an anti-freeze solution until used for immunostainings.

135 *Immunofluorescence*. Brain sections were rinsed in PBS for 3 x 10 min and were blocked in 4.5% normal  
136 goat serum (NGS), 0.2% Triton X-100 in PBS (PBST) for 1 h at room temperature (RT). Brain sections  
137 were incubated overnight at 4°C with the primary antibodies diluted in 3% NGS/PBST: anti-DARPP32-  
138 647 (1:1,000, Mouse; Santa Cruz Biotechnology, Santa Cruz, CA, #sc-271111 AF647), anti-GFAP-Cy3  
139 (1:1,000, Mouse; Sigma, Saint-Louis, MO, #C9205), anti-GFP biotinylated antibody (1:500, Goat;  
140 Vector Laboratories, Burlingame, CA, #BA-0702), anti-IBA1 (1:500, Rabbit; Wako, Richmond, VA,  
141 #019-19741), anti-MBP (1:500, Rabbit; Sigma, #M3821), anti-Olig2 (1:500, Rabbit, Millipore,  
142 Burlington, MA, #Ab9610), anti-S100 $\beta$  (1:500, Mouse; Sigma #S2532), anti-V5 (1:1,000, Mouse;  
143 Invitrogen, R96025), anti-Vimentin (1:1,000, Chicken; Abcam, Cambridge, UK, #ab24525) and  
144 NeuroTrace 640/660 (1:250; ThermoFisher Scientific, Waltham, MA, #N21483). For DNAJB1 staining  
145 (1:100, Rabbit; Enzo Life Sciences, Farmingdale, NY, Hsp40/Hdj1 antibody ADI-SPA-400), brain  
146 sections were pretreated in 0.1 M Tris-HCl, pH 9 at 95°C for 30 min and NGS was replaced by 5% BSA  
147 in blocking solution and antibody diluent. For EM48 (1:200, Mouse; Merck, Kenilworth, NJ,  
148 MAB5374), sections were blocked in 3% BSA, 2% NGS/PBST and incubated with primary antibody in  
149 the same solution for 36 h. STAT3 immunostaining was performed as described previously<sup>22</sup>. For NeuN  
150 staining (1:500, Mouse; Chemicon, Billerica, MA, #MAB377), the “mouse on mouse” kit (Vector  
151 Laboratories) was used, according to the manufacturer’s instructions. Brain sections were then rinsed 3  
152 x 10 min in PBS and incubated with appropriate secondary Alexa Fluor-conjugated antibodies (1:1,000,  
153 Goat; Invitrogen) or for GFP staining with Streptavidine-FITC (1:1,000, ThermoFisher Scientific,  
154 #SA100-02) in 3% NGS/PBST for 1 h at RT. Brain sections were rinsed three times with PBS before  
155 being mounted on SuperFrost® Plus slides (ThermoFisher Scientific) and coverslipped with  
156 Fluorsave™ (Calbiochem, Darmstadt, Germany). Double or triple immunofluorescent stainings were  
157 performed successively, with each antibody incubated alone.

158 *Immunohistochemistry with EM48 or Ubiquitin antibodies*. Brain sections were pre-treated in 0.3%  
159 H<sub>2</sub>O<sub>2</sub>, blocked in 10% NGS/PBST (Ubiquitin) or 3% BSA/PBST (EM48) and incubated overnight at  
160 4°C in the same diluent, with primary antibodies directed against EM48 (1:200) or Ubiquitin (1:1,000,  
161 Rabbit; Dako, Santa Clara, CA, z0458). After rinsing, brain sections were incubated with biotinylated  
162 secondary antibodies (1:1,000, Vector Laboratories) for 1 h at RT. Finally, they were incubated with the  
163 Vectastain Elite ABC Kit (Vector Laboratories) and revealed with the VIP kit (Vector Laboratories).  
164 Sections were rinsed three times with PBS before being mounted on SuperFrost® Plus slides,  
165 dehydrated and coverslipped with Eukitt (Sigma).

166

## 167 **Immunostaining quantification.**

168 The levels of GFAP immunoreactivity and the GFAP<sup>+</sup> volume were quantified on 10x-tiled images  
169 of serial sections along the antero-posterior axis of the striatum, acquired with an epifluorescence  
170 microscope equipped with a motorized stage (Leica DM6000, Nussloch, Germany). Virally transduced  
171 GFP<sup>+</sup> area was manually segmented on each section and the corresponding mean intensity signal for

172 GFAP in this area was extracted with Image J. Background intensity signal was measured on unstained  
173 regions of the same section and subtracted to the GFAP total signal. The volume was calculated from  
174 the area measured on each section by the Cavalieri method<sup>40</sup>.

175 To quantify lesion size, images of DARPP32 immunostained serial striatal sections were acquired at  
176 the 5x objective with an epifluorescence microscope (Leica DM6000). DARPP32-depleted area in the  
177 striatum was manually segmented with Image J on each serial section, and the total volume calculated  
178 with the Cavalieri method.

179 To quantify astrocyte soma area and STAT3 immunoreactivity, stacked confocal images of GFP and  
180 STAT3 immunostained sections were acquired with a 40× objective (3 brain sections per mouse, 3 fields  
181 per section, 10 to 16 z-steps of 1 μm, kept constant within a cohort, maximum intensity stack). GFP<sup>+</sup>  
182 cell bodies were manually segmented and their individual area and mean grey value for STAT3 were  
183 measured with Image J.

184 The total number and surface of EM48<sup>+</sup> and Ubiquitin<sup>+</sup> aggregates were quantified on serial striatal  
185 sections along the antero-posterior axis, scanned with an Axio scanZ.1 (Zeiss, Oberkochen, Germany)  
186 at the 40x objective in bright field microscopy mode, with multi-plan focusing. Aggregates were  
187 automatically detected by the Morphostrider software (ExploraNova), with intensity, size and shape  
188 thresholds, after manual segmentation of the striatum on each section. The total number of aggregates  
189 within each striatum was then calculated. To quantify the distribution of EM48<sup>+</sup> aggregates in  
190 DARPP32<sup>+</sup> neurons and GFP<sup>+</sup> astrocytes, stacked confocal images (16 z-steps of 1 μm, maximum  
191 intensity stack) were acquired on a Leica TCS SP8 confocal fluorescent microscope with a 40x objective  
192 (3 brain sections per mouse, 3 fields per section). Aggregates were automatically detected with ImageJ  
193 software, with intensity, size and shape thresholds. Laser intensity, detection settings and analysis  
194 parameters were identical between each mouse of the same cohort. The number of aggregates in each  
195 cell type and the total number were manually quantified using ImageJ cell counter plugin.

196

### 197 **Staining of human brain sections.**

198 Frozen blocks of the putamen were obtained from the Netherland Brain Bank (NBB), Netherlands  
199 Institute for Neuroscience, Amsterdam (open access: [www.brainbank.nl](http://www.brainbank.nl)). All Material has been  
200 collected from donors from whom a written informed consent for a brain autopsy and the use of the  
201 material and clinical information for research purposes had been obtained by the NBB. Four HD patients  
202 (Vonsattel stage III) and four control subjects matched for age, sex and post-mortem delay were analysed  
203 (see **Supplemental table 2**). Blocks were cut into 10 μm sections on a cryostat, post-fixed in 4% PFA  
204 for 1 h and in ice-cold methanol for 10 min. Sections were then incubated in 0.1 M Tris-HCl (pH 9) at  
205 95°C, for 20 min, in 0.3% H<sub>2</sub>O<sub>2</sub> for 30 min, and in 5% BSA/PBST for 1 h. Sections were incubated 48  
206 h at 4°C in 5% BSA/PBST, with primary antibodies against GFAP (1:10,000, Rabbit, Dako, #Z033429-  
207 2), STAT3 (1:200), NeuN (1:2,000) or DNAJB1 (1:100). After rinsing, sections were incubated with



208 biotinylated secondary antibodies (1:1,000, Vector Laboratories) for 1 h at RT, and after rinsing, with  
209 the Vectastain Elite ABC Kit for 1 h and revealed with the DAB substrate kit (Vector Laboratories).  
210 Sections were incubated for 2 s in 50% Mayer's hemalum solution (Merk, #109249) and rinsed with tap  
211 water before being dehydrated and coverslipped with Eukitt. Representative images in each panel were  
212 taken with a Leica microscope, in the same anatomical region identified on consecutive sections.

213

### 214 **Protein extraction.**

215 Mice were killed by cervical dislocation and their brains were rapidly collected. The striatum was  
216 dissected out on ice, snap frozen in liquid nitrogen and stored at -80°C until protein extraction. Samples  
217 were homogenized by sonication in 20 volumes of lysis buffer [50 mM Tris-HCl pH 8, 150 mM NaCl,  
218 1% Triton X-100 (Tx) with 1:100 phosphatase inhibitors (Sigma, cocktail 2) and 1x protease inhibitors  
219 with EDTA (Roche, Basel, Switzerland)] and centrifuged at 16,000 g for 30 min at 4°C. The supernatant  
220 contains Tx-soluble proteins and was used for immunoblotting. The Tx-insoluble pellet was washed  
221 with PBS and centrifuged at 16,000 g for 5 min at RT. The pellet was sonicated in a second lysis buffer  
222 [50 mM Tris-HCl pH 8, 2% Sodium Dodecyl Sulfate (SDS) with 1:100 phosphatase and protease  
223 inhibitors and centrifuged at 16,000 g for 30 min at 4°C. The supernatant was collected and used for  
224 immunoblotting, as the SDS-soluble fraction.

### 225 **Exosome isolation.**

226 Mice were killed by cervical dislocation and their brains were rapidly collected to isolate exosomes,  
227 as described in Vella *et al.*<sup>43</sup>. The striatum was dissected out on ice, snap frozen in liquid nitrogen and  
228 stored at -80°C until processing. Two or three striata were pooled by sample. Frozen striata were  
229 incubated in 75 U/ml collagenase III in Hibernate E solution (ThermoFisher Scientific, 8 µl/mg) at 37°C  
230 under agitation. After 5 min, pieces of striatal tissue were gently pipetted up and down with a 1 ml  
231 pipette, then with a large diameter fire-polished Pasteur pipette and incubated at 37°C for 10 min. Then,  
232 tubes were gently inverted and returned to the incubation bath for 5 min (total incubation at 37°C: 20  
233 min). Tubes were collected on ice and protease inhibitors were added at 1x final concentration. To  
234 discard debris, samples were sequentially centrifuged at 4°C at 300 g for 5 min, 2,000 g for 10 min and  
235 10,000 g for 30 min. The last supernatants were collected and Hibernate E with protease inhibitors was  
236 added to a final volume of 3 ml. The first pellet was resuspended in 150 µl of 50 mM Tris-HCl, 1%  
237 SDS, 150 mM NaCl, 1 mM EDTA, pH 7.4 with protease inhibitors, and sonicated to be analysed by  
238 immunoblotting as total brain homogenates. A sucrose step was prepared for each sample as 0.3 ml of  
239 2.5 M sucrose, 0.4 ml of 1.3 M sucrose, 0.4 ml of 0.6 M sucrose. The sample (3 ml in Hibernate E) was  
240 overlaid on top of the gradient. Sucrose steps were then centrifuged at 180,000g for 190 min at 4°C in  
241 a SW60 swinging rotor (Beckman, Brea, CA). After removing the top 2.6 ml of the step, three 0.4 ml-  
242 fractions (F1 to F3) were collected. Each fraction was diluted in 0.9 ml cold Dulbecco's PBS (DPBS)  
243 with protease inhibitors and centrifuged at 100,000g for 1 h at 4°C on a fixed TL110 rotor (Beckman).

244 The pellet containing vesicles was resuspended in 10  $\mu$ l of cold DPBS with protease inhibitors and  
245 further diluted in loading buffer for immunoblotting or frozen until imaging by transmission electron  
246 microscopy (TEM).

247 The purity of exosomal fractions 2 and 3 was controlled by immunoblotting for known exosomal  
248 proteins (Flotillin-1 and TSG101) and for the mitochondrial protein voltage-dependent anion channel  
249 (VDAC), which is not present in exosomes (**Supplemental Fig. 1c**).

250 These fractions were also analysed by TEM as described previously<sup>44</sup>. Exosomal fractions were  
251 mixed with an equal volume of 4% PFA and incubated for 20 min at 4°C. Fixed vesicles were then  
252 applied to carbon coated TEM grids and allowed to adsorb for 20 min at RT. TEM grids were then  
253 washed by sequential transfers on drops of PBS, incubated for 5 min at RT in 1% glutaraldehyde, and  
254 then washed by sequential transfers on drops of distilled water. Following negative-staining with 1%  
255 Gadolinium triacetate (EM stain 336, Agar Scientific, Stansted, UK) for 10 min at RT, samples were  
256 imaged in a Jeol 1400 transmission electron microscope (Jeol, Croissy/Seine, France). Images were  
257 recorded with a Gatan Orius CCD camera (Gatan, Pleasanton, CA) and processed with the Image J  
258 software.

259

## 260 **Immunoblot.**

261 Protein concentration was measured by the bicinchoninic acid assay (Pierce, Waltham, MA).  
262 Samples were diluted in loading buffer with dithiothreitol (NuPAGE<sup>®</sup> LDS sample buffer and sample  
263 reducing agent, Invitrogen). Proteins (10  $\mu$ g for Tx-soluble fraction and 5  $\mu$ g for SDS-soluble fraction)  
264 was loaded on a 7.5% or 4-12% Criterion<sup>™</sup> TGX Stain-Free Protein Gels (Bio-Rad, Hercules, CA).  
265 Protein concentrations in exosomal fractions were below detection level. Instead, an equal volume of  
266 each fraction was loaded on the gel. Migration was performed at 200 V for 30 min in Tris-glycine buffer  
267 (Bio-Rad) and proteins were transferred on a nitrocellulose membrane with the Trans-Blot Turbo<sup>™</sup>  
268 Transfer System (Bio-Rad). After 3 x 10 min rinses in Tris Buffer Saline and 0.1% Tween 20 (TBST),  
269 membranes were blocked in 5% milk in TBST for 1 h at RT and incubated for 3 h at RT, or overnight  
270 at 4°C with the following primary antibodies: anti-Actin (1:5,000, Mouse; Sigma, #A2066), anti-  
271 Flotillin-1 (1:1,000, Rabbit; Sigma, F1180), anti-DNAJB1 (1:1,000), anti-HTT (2B4, 1:1,000, Mouse;  
272 Millipore, MAB5492), anti-mHTT (1C2, 1:1,000, Mouse; Millipore, MAB1574), anti-Ubiquitin  
273 (1:1,000), anti-TSG101 (1:500, Rabbit; Sigma, HPA006161), anti- $\alpha$ -tubulin (1:5,000, Mouse; Sigma,  
274 T5168), and anti-VDAC (1:1,000, Rabbit; Abcam, ab15895). After 3 x 10 min washes in TBST,  
275 membranes were incubated for 1 h at RT with HRP-conjugated secondary antibodies (1:5,000, Vector  
276 laboratories) diluted in TBST with 5% milk. Membranes were incubated with the Clarity Western ECL  
277 substrate (Bio-Rad) and the signal was detected with a Fusion FX7 camera (ThermoFisher Scientific).  
278 Band intensity was quantified with Image J and normalized to actin or  $\alpha$ -tubulin. For quantification of  
279 exosome proteins, the Stain-free technology (Bio-Rad) was used. Stain-free gels were exposed to UV  
280 light to activate tryptophan residues, resulting in UV-induced fluorescence of total loaded proteins. UV

281 exposition and chemiluminescence acquisition were done with a ChemiDoc XRS+ system (Bio-Rad).  
282 DNAJB1 bands were normalized to total stained proteins using Image Lab Version 5.2.1 software (Bio-  
283 Rad). Each protein of interest was assessed at least on two different immunoblots.

284

### 285 **Quantification of cathepsin and proteasome activities in astrocytes.**

286 Hdh140 mice previously injected with astrocyte-specific AAV-GFP or AAV-Td-Tomato in the  
287 striatum to label astrocytes, were perfused with cold PBS for 4 min. Their striata were rapidly collected  
288 in Hank's Balanced Salt Solution (HBSS; Sigma). Cells were mechanically and enzymatically  
289 dissociated with fire-polished Pasteur pipettes and the neural tissue dissociation kit with papain  
290 (Miltenyi Biotec, Bergisch Gladbach, Germany), following manufacturer's instructions. After filtration  
291 through a 50  $\mu$ m-filter, myelin removal beads II and MS columns (Miltenyi Biotec) were used to deplete  
292 myelin from cell suspensions. Cells were then resuspended in 0.5% PNB buffer (Perkin Elmer, FP1020)  
293 and incubated for 30 min with 1  $\mu$ M fluorescent cathepsin probe (iABP, Vergent Bioscience,  
294 Minneapolis, MN, #40200,) or with 200 nM proteasome probe (UbiQ, Bio BV, Amsterdam, the  
295 Netherlands, UbiQ-018,) at RT. Cells were centrifuged at 300 g for 5 min at 4°C and resuspended in  
296 400  $\mu$ l HBSS. They were sorted on a BD Influx cell sorter. GFP expressed by infected astrocytes was  
297 detected at 530/40 nm (488 nm excitation) and the cathepsin probe was detected at 670/30 nm (646 nm  
298 excitation). Td-Tomato expressed by infected astrocytes was detected at 579/34 nm (561 nm excitation)  
299 and the proteasome probe at 530/40 nm (488 nm excitation). Control samples of unlabelled or mono-  
300 fluorescent brain cells were used to define detector gains and sorting gates, which were kept constant  
301 for all samples. No compensation was required to accurately quantify the two fluorescent signals within  
302 the same cell. Cells were gated on a side scatter/ forward scatter plot, then singlets were selected and  
303 finally the percentage of GFP<sup>+</sup>/Cathepsin<sup>+</sup> or Td-Tomato<sup>+</sup>/Proteasome<sup>+</sup> astrocytes was quantified in each  
304 mouse, after setting the gates on GFP<sup>+</sup> or Td-Tomato<sup>+</sup> astrocytes incubated without a probe (i.e.  
305 Fluorescence Minus One (FMO) controls, **Supplemental Fig. 1b**).

306

### 307 **RNA extraction on bulk samples and RT-qPCR.**

308 Mice were euthanized with an overdose of sodium pentobarbital, their brains were rapidly collected,  
309 the GFP<sup>+</sup> area was dissected out under a fluorescent microscope (Leica) and lysed in Trizol with a  
310 MagNa Lyser instrument (Roche). Samples were stored at -80°C until further processing. Samples were  
311 placed 5 min at RT before addition of chloroform for 3 min, and centrifugation at 12,000 g for 15 min  
312 at RT. Aqueous phase was collected and 1 volume of 70% ethanol was added. Samples were transferred  
313 onto an RNeasyMin Elute spin column and RNA was purified according to manufacturer's instructions,  
314 with on-column DNase treatment (RNeasy micro kit, Qiagen, Hilden, Germany). RNA was eluted with  
315 14  $\mu$ l of RNase-free deionized water and stored at -80°C before transcriptomic analysis. RNA quality  
316 and integrity was evaluated with an Agilent RNA 6000 Pico assay and the Agilent 2100 Bioanalyzer  
317 (Agilent technologies, Santa Clara, CA). Reverse transcription was performed with the VILO™ kit

318 according to the manufacturer's protocol (SuperScript<sup>®</sup> VILO<sup>™</sup> cDNA synthesis kit; Life Technologies,  
319 Carlsbad, CA). Samples were diluted in H<sub>2</sub>O with 100 µg/ml BSA at 0.2 ng/µl and mixed with 250 nM  
320 of each primers and iTaq Universal SYBR Green Supermix (Bio-rad) for qPCR. PCR efficiency was  
321 between 85 and 110% for each set of primers (sequences shown in **Supplemental table 1**). Nuclease-  
322 free water and samples without reverse transcription were used as negative controls. Expression levels  
323 of transcripts of interest were normalized with the  $\Delta$ Ct method to the abundance of the best combination  
324 of normalizers among *Eef1*, *Erp29*, *Ppia*, *Rpl13a*, as identified with the Genorm method, implemented  
325 in Bio-rad CFX Manager software.

326

### 327 **Microarray analysis of acutely sorted astrocytes.**

328 WT mice injected with AAV-GFP or AAV-JAK2+AAV-GFP (same total viral load) were killed and  
329 their striatum rapidly collected in HBSS. The two striata of four mice were pooled before processing.  
330 Astrocytes were sorted as mentioned above, except that dissociated cells were prepared without the steps  
331 of myelin removal and probe incubation.

332 A total of 10 sorted cell samples were processed for microarray analysis (4 GFP<sup>+</sup> astrocytes in the  
333 control WT-GFP group, 4 GFP<sup>+</sup> astrocytes in the WT-JAK2ca group and 2 GFP<sup>-</sup> cells in the WT-GFP  
334 group to validate astrocyte sorting efficiency). RNA was extracted as described in the previous  
335 paragraph. RNA quality and integrity was evaluated with an Agilent RNA 6000 Pico assay and the  
336 Agilent 2100 Bioanalyzer (Agilent technologies). RNA was amplified with the Ovation PicoSL VTA  
337 system V2 kit (NuGen technologies, San Carlos, CA). Single strand DNA and single primer isothermal  
338 amplification cDNA were purified with Agencourt RNAClean XP (NuGen technologies). cDNA  
339 concentration was measured with a Nanodrop-1000 spectrophotometer (Labtech France). The Encore  
340 biotinL kit (NuGen technologies) was used for the fragmentation and labelling of the purified SPIA  
341 cDNA prior to hybridization on the Illumina BeadChip mouse WG-6v2, which contains more than  
342 45,000 unique 50-mer oligonucleotides (Illumina, San Diego, CA). BeadChips were scanned on the  
343 Illumina IScan. A control summary report was generated by the GenomeStudio software (Illumina) to  
344 evaluate the performance of built-in controls (variation in hybridization and background signals and  
345 background/noise ratio). Quantile normalization without background subtraction was applied to all  
346 samples within an analysis, with GenomeStudio software. First, to validate sorting efficiency, we  
347 compared the 4 GFP<sup>+</sup> astrocyte samples with the 2 GFP<sup>-</sup> cell samples from the WT-GFP group (*t* test, *p*  
348 < 0.05 and Fold change > 1.5). Then, we compared the 4 GFP<sup>+</sup> astrocyte samples from WT-GFP mice  
349 with the 4 GFP<sup>+</sup> astrocyte samples from the WT-JAK2ca mice to identify transcriptional changes  
350 induced by JAK2ca in astrocytes. To study only genes with reliable expression levels, we included  
351 probes with a “signal *p* value” above 0.01 in more than 50% of the samples. Samples with a signal *p*  
352 value below 0.01 were arbitrarily given a signal value of 75 (the lowest possible signal value being  
353 76.5). Expression levels of detectable probes were compared between WT-GFP and WT-JAK2ca  
354 astrocytes with the limma (linear models for microarray data) package<sup>45</sup>. Analysis for enriched Gene

355 ontology (GO) terms [Biological Processes (BP), Molecular Functions (MF) and Cellular Component  
356 (CC)] and Kyoto Encyclopaedia of Genes and Genomes (KEGG) pathways were performed with an  
357 adapted function from the R package limma (v3.44.3). Significant GO-BP and GO-MF entries relevant  
358 to proteostasis were selected, and all differentially expressed genes belonging to these GO entries were  
359 plotted as a network, with the 'cnetplot' function from the R package DOSE (v2.10.6). Microarray  
360 datasets are deposited on GEO under reference GSE107486.

361

## 362 **RNAseq analysis of acutely sorted astrocytes from Hdh140 mice.**

363 To analyse the transcriptome of astrocytes acutely sorted by FACS from the striatum of 12-14 month-  
364 old Hdh140 mice injected with AAV-GFP or AAV-JAK2ca (N=5-6), we followed the protocol  
365 described in Ceyzériat *et al.*<sup>39</sup>, except that the lower number of astrocytes sorted per sample was not  
366 compatible with RNA quality assessment, and full length double strand cDNA libraries were amplified  
367 with 16 LD-PCR cycles. The final mRNAseq libraries were then sequenced on a HiSeq 2500 Illumina  
368 platform (2 × 100 bp). Quality control of sequencing data was performed with FastQC (v0.11.9)<sup>46</sup>. Reads  
369 were mapped on the GRCm38 (mm10) mouse genome assembly with Hisat2 (v2.2.1)<sup>47</sup>. Quantification  
370 of reads associated with genes was achieved with featureCounts (v2.0.0)<sup>48</sup>, and differential gene  
371 expression analysis was performed with DESeq2 (v1.28.1) on R (v4.0.2)<sup>49</sup>. Only genes with a raw  
372 number of counts  $\geq 10$ , in at least 3 samples were analysed. Results were considered statistically  
373 significant for an adjusted  $p$  value  $\leq 0.1$  and fold-changes  $\geq 1.5$ . GO and KEGG analysis was performed  
374 on R as described for microarray data, and fast preranked gene set enrichment analysis (GSEA) was  
375 carried out with the fgsea (v1.16.0) package on R as well<sup>50</sup>. RNAseq data is deposited on GEO under  
376 reference GSE171141.

377

## 378 **Identification of regulatory transcription factors.**

379 We performed bioinformatics analysis on the list of 2,250 differentially expressed genes between  
380 control and HD astrocyte nuclei isolated from the cingulate cortex of human subjects (Additional file 9  
381 in Al-Dalahmah *et al.*<sup>5</sup>). To identify putative upstream transcription factors, we used HOMER<sup>51</sup> and  
382 Pscan with the TRANSFAC database<sup>52</sup>, two tools based on motif recognition in the promoter region of  
383 regulated genes. We also used three of the assembled transcription factor libraries from publicly  
384 available data (e.g. chromatin immunoprecipitation experiments, co-expression datasets) offered by the  
385 ChEA3 tool<sup>53</sup>: Enrichr, ENCODE and ReMap.

386

## 387 **Statistics.**

388 Values for each individual samples are shown on graphs. Arithmetic means are represented by a  
389 horizontal line and paired samples from two groups are connected by a line. Sample size was chosen  
390 based on prior experience for each experiment, to yield adequate power to detect specific effects. Mice

391 of the appropriate genotype were randomly allocated to experimental groups. Statistical analysis was  
392 performed with Statistica software (StatSoft, Tulsa, OK) and graphs were prepared with GraphPad Prism  
393 7 (La Jolla, CA). Paired or unpaired two-tailed Student *t*-test were used to compare two groups, or  
394 ANOVA to compare four groups. For each analysis, normality of residues and homoscedasticity were  
395 assessed. If any condition of application was not fulfilled, we used non-parametric tests: two groups  
396 were compared by the Mann-Whitney or Wilcoxon paired tests. Percentages were first changed to  
397 proportions and transformed by the *arcsine* function, before being analysed by paired or unpaired *t*-test.

398 Investigators were partially blinded to the group when performing experiments and analysis, as the  
399 group can be deduced by the presence of aggregates or GFP levels for example. The significance level  
400 was set at  $p < 0.05$ . Figure legends are encoded as follows \*  $p < 0.05$ , \*\*  $p < 0.01$ , \*\*\*  $p < 0.001$ . In  
401 each figure legend, N refers to the number of mice.

402

## 403 Results

### 404 STAT3 activation in reactive astrocytes in HD patients

405 STAT3 is involved in the control of reactive astrocytes in multiple CNS diseases and their animal  
406 models<sup>21</sup>, but it has never been studied in the brain of HD patients. We performed STAT3  
407 immunostainings in the putamen of HD patients (Vonsattel grade III<sup>6</sup>) and their age- and sex-matched  
408 controls. There was a stronger STAT3 immunoreactivity in HD patients, especially in regions showing  
409 neurodegeneration as seen by their lower density in NeuN<sup>+</sup> neurons and higher density in hypertrophic  
410 GFAP<sup>+</sup> astrocytes (**Fig. 1**). Many STAT3<sup>+</sup> cells had a typical astrocyte morphology and displayed  
411 nuclear accumulation of this transcription factor (**Fig. 1**), an indication of pathway activation<sup>21</sup>.

412 We also analysed available transcriptomic data of nuclei isolated from the cingulate cortex of grade  
413 III/IV HD patients<sup>5</sup> to identify potential active transcription factors in HD astrocytes. Several  
414 bioinformatics tools (based on literature mining or DNA motif recognition in the promoter of  
415 differentially expressed genes, see Methods) identified STAT3 as a potential regulatory transcription  
416 factor in HD astrocytes, with significant associated *p* values (**Table 1**).

417 Together, these results support a role for STAT3 in driving astrocyte reactive changes in HD.

418

### 419 Astrocytic JAK2-STAT3 pathway reduces neuronal mHTT aggregation in two 420 HD mouse models

421 To determine the molecular and functional regulation operated by STAT3 in HD reactive astrocytes,  
422 we took advantage of our viral vectors that transduce striatal astrocytes with high efficiency and  
423 selectivity (**Supplemental Fig. 1a**), to either activate or inhibit the JAK2-STAT3 pathway<sup>39, 40</sup>.

424 We first studied knock-in Hdh140 mice that express a humanized *HTT* gene with 140 CAG repeats  
425 under its own endogenous promoter<sup>35</sup>. These mice develop progressive HD symptoms with small intra-  
426 neuronal mHTT aggregates, early transcriptional defects in neurons, but very mild morphological and  
427 molecular reactive changes in astrocytes<sup>20, 54</sup>. In this model, we thus stimulated the JAK2-STAT3  
428 pathway in striatal astrocytes by virus-mediated expression of a constitutively active form of JAK2  
429 (JAK2ca).

430 A lentiviral vector targeting astrocytes and encoding JAK2ca (LV<sub>A</sub>-JAK2ca) was injected in 7-9  
431 month-old heterozygous Hdh140 mice, with a LV<sub>A</sub> encoding GFP (LV<sub>A</sub>-GFP) to visualize infected  
432 astrocytes (Hdh140-JAK2ca mice, **Fig. 2a**). Controls were Hdh140 mice injected with LV<sub>A</sub>-GFP at the  
433 same total viral titer (Hdh140-GFP mice), and brains from both groups were analysed 4 months later  
434 (**Fig. 2a**). Immunostaining on mouse brain sections showed that JAK2ca activated STAT3 (**Fig. 2b**) and  
435 induced the two cardinal features of reactive astrocytes: overexpression of the intermediate filaments  
436 GFAP (**Fig. 2b, c**) and soma hypertrophy (**Fig. 2b, d**). JAK2ca also increased mRNA levels of *Vimentin*  
437 and *Serpina3n*, two markers of reactive astrocytes (**Fig. 2e, f**). We controlled that JAK2ca did not impact

438 total mRNA levels of murine *Htt* and *mHTT*, which were expressed at similar levels in Hdh140-JAK2ca  
439 and Hdh140-GFP groups ( $p = 0.230$  and  $p = 0.258$  respectively, Student *t*-test).

440 JAK2ca expression in Hdh140 astrocytes significantly reduced the total number of mHTT aggregates  
441 in the striatum (**Fig. 2g, h**). The size of EM48<sup>+</sup> aggregates was also significantly decreased in Hdh140-  
442 JAK2ca mice (**Fig. 2i**). Most EM48<sup>+</sup> aggregates were in small neuronal processes, while more than 30%  
443 of them were found in the nucleus or cell body of striatal neurons expressing dopamine- and cAMP-  
444 regulated neuronal phosphoprotein (DARPP32), and less than 1% of all mHTT aggregates were found  
445 in GFP<sup>+</sup> astrocytes (**Fig. 2j, k**). Despite the marked reduction in the number of mHTT aggregates, this  
446 relative distribution was not significantly impacted by JAK2ca ( $p = 0.104$  for DARPP32<sup>+</sup> neurons,  $p =$   
447  $0.636$  in GFP<sup>+</sup> astrocytes, *t*-test on *arcsine*-transformed data, **Fig 2k**).

448 To determine whether soluble mHTT was also reduced by JAK2ca, we analysed Triton X-100 (Tx)-  
449 soluble protein extracts prepared from the striatum of WT and Hdh140 mice injected with LV<sub>A</sub>-GFP or  
450 LV<sub>A</sub>-JAK2ca. Immunoblotting with the 1C2 antibody that recognizes preferentially the elongated poly-  
451 glutamine stretch of mHTT showed similar Tx-soluble mHTT levels in both groups (**Fig. 2l, n**,  $p =$   
452  $0.139$ , paired *t*-test). We then immunoblotted proteins from the Tx-insoluble, SDS-soluble fraction with  
453 the 2B4 antibody, which preferentially binds to the N-terminal part of mHTT. High molecular weight  
454 forms of mHTT corresponding to aggregated fragments of mHTT were detected only in samples from  
455 Hdh140 mice. The levels of high molecular weight aggregated mHTT were lower in the Hdh140-  
456 JAK2ca group, in accordance with histological data of reduced mHTT aggregation with JAK2ca (**Fig.**  
457 **2m, o**).

458 Hdh140 mice do not show the typical striatal neurodegeneration observed in HD patients, but display  
459 early transcriptional defects in striatal neurons, in particular for *Ppp1r1b* transcripts (which encodes the  
460 striatal protein DARPP32). In Hdh140 mice, JAK2ca expression in striatal astrocytes significantly  
461 increased *Ppp1r1b* mRNA levels (**Fig. 2p**), suggesting a beneficial effect upon neurons.

462  
463 To provide an independent demonstration that JAK2-STAT3 pathway activation in striatal astrocytes  
464 reduces the amount and size of mHTT aggregates in neurons, we performed a complementary  
465 experiment by blocking this pathway in astrocytes, with its inhibitor Suppressor Of Cytokine Signalling  
466 3 (SOCS3). For that, we selected another HD model that better replicates the strong neurodegeneration  
467 and subsequent astrocyte reactivity observed in the striatum of HD patients<sup>8,22</sup>. This HD model involves  
468 lentivirus-mediated expression of the 171 first amino acids of HTT with 82 CAG repeats in striatal  
469 neurons<sup>41</sup> (**Fig 3a**). In this model, SOCS3 expression in astrocytes efficiently blocked STAT3 activation  
470 and reactive changes in astrocytes (**Fig 3b-f**)<sup>22</sup>. SOCS3 expression in striatal astrocytes increased the  
471 aggregation of mHTT, as seen with EM48 immunostaining (**Fig. 3g, h**). Less than 2% of mHTT  
472 aggregates were found in GFP<sup>+</sup> astrocytes (**Fig. 3h**), and this distribution was not changed by SOCS3  
473 ( $p = 0.380$ , paired *t*-test on *arsine*-transformed data, data not shown). mHTT aggregates are  
474 ubiquitinated and the total number of Ubiquitin (Ub)<sup>+</sup> aggregates was also increased by SOCS3 (**Fig. 3i,**



475 j). In addition, aggregates were larger in the SOCS3 group than in the GFP group (**Fig. 3k**), revealing  
476 both quantitative and qualitative changes in neuronal mHTT aggregates following JAK2-STAT3  
477 inhibition in astrocytes.

478 In the lentiviral HD model, mHTT causes local neuronal degeneration, visible as DARPP32-depleted  
479 lesion (**Fig. 3l**). SOCS3 significantly increased the lesion volume (**Fig 3m**), and reduced *Ppp1r1b*  
480 mRNA levels (**Fig. 3n**).

481 Overall, our data show that activation of the JAK2-STAT3 pathway in reactive astrocytes reduces  
482 the number and size of neuronal mHTT aggregates and mitigates HD alterations, while blocking the  
483 pathway has opposite effects.

484

### 485 **JAK2ca regulates the expression of proteostasis genes in astrocytes**

486 How can JAK2-STAT3 pathway activation in reactive astrocytes impact mHTT aggregation in  
487 neurons? As the JAK2-STAT3 cascade regulates gene expression, we investigated transcriptional  
488 changes induced by JAK2ca by comparing the transcriptome of acutely sorted astrocytes isolated from  
489 WT-JAK2ca and WT-GFP control mice by microarray (**Fig. 4a**). Transduced astrocytes were collected  
490 by fluorescence-activated cell sorting (FACS) based on their GFP expression. GFP<sup>-</sup> cells, comprising  
491 microglia, neurons, oligodendrocyte precursor cells (OPC), oligodendrocytes and few non-infected  
492 astrocytes, were collected together. There were 1,415 differentially expressed transcripts (fold change  
493 > 1.5,  $p < 0.05$ ), between GFP<sup>+</sup> and GFP<sup>-</sup> cell samples in control WT-GFP mice (**Fig. 4b**). Besides *eGfp*,  
494 many known astrocyte gene markers were enriched in GFP<sup>+</sup> cells (e.g. *AldoC*, *Aqp4*, *Gjal*, *Gjb6*, *Slc1a2*,  
495 *Slc1a3*). Conversely, known markers for microglial cells, neurons, OPC, oligodendrocytes were  
496 enriched in GFP<sup>-</sup> cells (e.g. *Aif*, *Trem2*, *P2ry12*, *Pde10a*, *Snap25*, *Pdgfra*, *Myt1*). The sorting procedure  
497 being validated, we next compared the gene expression profile of GFP<sup>+</sup> astrocytes isolated from WT-  
498 GFP and WT-JAK2ca mice.

499 We found 888 probes (802 unique transcripts) differentially expressed between JAK2ca-astrocytes  
500 and control GFP-astrocytes, including *Jak2* mRNA itself (**Supplementary Fig. 2f**). A Gene Ontology  
501 (GO) analysis revealed a significant enrichment in many GO-biological processes linked to immunity  
502 and inflammation, confirming that JAK2ca triggers reactive changes in astrocytes, which were also  
503 evidenced by morphological changes (**Supplemental Fig. 2a-h**)<sup>39</sup>.

504 Among the differentially expressed genes between GFP- and JAK2ca-astrocytes, there was a specific  
505 enrichment in biological processes linked to lysosomes and the UPS, as well as other processes related  
506 to proteostasis (**Fig. 4c**). KEGG pathway analysis also revealed a significant enrichment in the term  
507 “lysosome” in JAK2ca-reactive astrocytes ( $p = 0.0005$ ). Several cathepsins (*Ctsc*, *Ctss* and *Ctsz*) were  
508 upregulated by JAK2ca in astrocytes (**Fig. 4c**). Genes linked to proteostasis formed a complex network  
509 of co-regulated genes in JAK2ca-astrocytes (**Fig. 4c**).

510 To confirm that the JAK2-STAT3 pathway was also able to induce a proteostasis gene signature in  
511 astrocytes in a HD context, we sorted striatal astrocytes from Hdh140-GFP and Hdh140-JAK2ca mice

512 thanks to their GFP expression, and performed RNAseq analysis (**Fig. 4d**). Again, sorted astrocytes  
513 expressed high levels of astrocyte-specific genes and low or undetectable levels of known markers for  
514 microglia, neurons, cells of the oligodendrocyte lineage and endothelial cells (**Supplemental Fig. 2i**).  
515 *Jak2* levels were significantly higher in JAK2ca-astrocytes than GFP-astrocytes (**Supplemental Fig.**  
516 **2j**). Murine *Htt*, on the contrary, was expressed at low levels in sorted astrocytes from both groups (rpkm  
517 value = 1.859 and 2.120 for GFP- and JAK2ca-astrocytes; adjusted *p*-value = 0.999), showing that  
518 JAK2ca does not change *Htt* transcription in striatal astrocytes. We found 269 genes differentially  
519 expressed between Hdh140-GFP and Hdh140-JAK2ca astrocytes. Among them, many were linked to  
520 immunity/inflammation, as found in WT-JAK2ca astrocytes (data not shown). As observed in WT-  
521 JAK2ca astrocytes, there was a significant enrichment in GO pathways related to proteostasis, including  
522 the molecular function “Heat shock protein binding” and the cellular components “lytic vacuole” and  
523 “lysosome” (**Fig. 4e**). Gene Set Enrichment Annotation (GSEA) also identified the term “phagosome”,  
524 as significantly enriched in Hdh140-JAK2ca astrocytes, with a majority of up-regulated genes  
525 (normalized enrichment score = 1.759, adjusted *p* value = 0.039).

526 Overall, this transcriptomic analysis shows that JAK2ca induces a specific proteostasis gene  
527 signature in striatal astrocytes both in WT and Hdh140 mice.

528

## 529 **JAK2ca increases proteolytic capacity in HD astrocytes**

530 It is important to establish that the identified transcriptional changes translate into detectable changes  
531 in astrocyte function<sup>55</sup>. To assess proteolytic activity of the two major clearance pathways in astrocytes,  
532 we used cell-permeable, activity probes for the lysosomal enzymes cathepsins and for the proteasome  
533 (**Supplemental Fig. 1b**).

534 We exposed acutely dissociated striatal cells from Hdh140-GFP and Hdh140-JAK2ca mice to a pan-  
535 cathepsin activity probe that becomes fluorescent when metabolized by cathepsins<sup>56</sup>. We then measured  
536 probe fluorescence in GFP<sup>+</sup> astrocytes from the two groups by FACS (**Fig. 5a**). There was a significantly  
537 larger fraction of GFP<sup>+</sup> astrocytes with high cathepsin activity in Hdh140-JAK2ca mice (**Fig. 5b**),  
538 revealing that JAK2ca increases lysosomal activity in astrocytes.

539 Another fluorescent probe was used to measure proteasome activity in acutely dissociated astrocytes  
540 (**Fig. 5c**)<sup>57</sup>. As the excitation/emission spectrum of this probe overlaps with GFP, we used a viral vector  
541 encoding the red fluorescent protein Td-Tomato instead of GFP to detect astrocytes in both groups.  
542 Again, the fraction of Td-Tomato<sup>+</sup> astrocytes with high proteasome activity was larger in Hdh140-  
543 JAK2ca mice than in Hdh140-Td-Tomato mice (**Fig. 5c**), showing that reactive astrocytes also have a  
544 higher proteasome activity.

545 As several ubiquitin ligases were differentially expressed in JAK2ca-astrocytes (**Fig. 4c**), we  
546 assessed ubiquitination by immunoblotting striatal homogenates with a Ub antibody. We did not observe  
547 major changes in the pattern of Ub immunoreactivity or in total Ub levels between Hdh140-GFP and  
548 Hdh140-JAK2ca mice, both in Tx- and SDS-soluble fractions (**Fig. 5d, e**), suggesting that only the

549 proteolytic step of the UPS is stimulated by JAK2ca, without global changes in the ubiquitination profile  
550 of mouse striatum.

551 To directly measure the intrinsic capacity of astrocytes to clear mHTT, we used viral vectors to force  
552 mHTT expression in astrocytes (LV<sub>A</sub>-mHTT). WT mice were injected in the right striatum with LV<sub>A</sub>-  
553 mHTT, LV<sub>A</sub>-SOCS3, and LV<sub>A</sub>-GFP, and in the control left striatum with LV<sub>A</sub>-mHTT and LV<sub>A</sub>-GFP, at  
554 the same total viral titer (**Fig. 6a**). Expression of mHTT in astrocytes also triggered STAT3 activation,  
555 as evidenced by its nuclear accumulation, and induced reactive changes in astrocytes (**Fig. 6b**)<sup>8</sup>. In this  
556 model as well, SOCS3 efficiently reduced GFAP levels (**Fig. 6b, c**), STAT3 nuclear accumulation (**Fig.**  
557 **6b, d**) and astrocyte soma hypertrophy (**Fig. 6b, e**). If the JAK2-STAT3 pathway enhances proteolytic  
558 activity in astrocytes, we reasoned that blocking this pathway with SOCS3 would increase mHTT  
559 aggregation in astrocytes. Indeed, we observed that the total number of mHTT aggregates in the striatum  
560 was increased with SOCS3 (**Fig. 6f, g**). Moreover, SOCS3 increased mHTT aggregate size (**Fig. 6f, h**).  
561 In this model, mHTT forms both nuclear and cytoplasmic inclusions in astrocytes (**Fig. 6f**). The fraction  
562 of nuclear aggregates in GFP<sup>+</sup> astrocytes was not changed by SOCS3 (19.1% and 22.0% respectively in  
563 GFP and SOCS3 groups,  $p = 0.458$ , *t*-test on *arcsine*-transformed data, data not shown). These results  
564 show that the JAK2-STAT3 pathway stimulates astrocyte intrinsic capacity for mHTT clearance.

565

## 566 **JAK2ca induces chaperone expression in astrocytes**

567 Interestingly, several GO-molecular functions linked to chaperones and protein folding were  
568 significantly regulated by JAK2ca in astrocytes (**Fig. 4c, e**). Chaperones prevent mHTT aggregation<sup>32</sup>  
569 <sup>58</sup> and can be released extracellularly in exosomes<sup>59</sup>.

570 We focused on the co-chaperone DNAJB1 [DnaJ heat shock protein family (Hsp40) member B1], a  
571 member of the HSP40 family, which is induced nearly 3-fold by JAK2ca (**Fig. 4c**). DNAJB1  
572 immunoreactivity was higher in the putamen of HD patients, specifically at the core of the degenerative  
573 area devoid of NeuN<sup>+</sup> neurons, where hypertrophic GFAP<sup>+</sup> astrocytes are abundant (**Fig. 7a**).

574 JAK2ca significantly increased DNAJB1 protein levels in the striatum of Hdh140 mice as seen by  
575 immunostaining (**Fig 7b, d**) and immunoblotting (**Fig. 7c**), while *Dnajb1* mRNA were significantly  
576 reduced by SOCS3 in the lentiviral HD model (**Fig. 7e**). In Hdh140 mice, DNAJB1 displayed a diffuse  
577 cytosolic staining but also formed small nuclear inclusion-like structures, suggesting that DNJAB1 can  
578 be in close association with mHTT aggregates (**Fig. 7d**).

579 We next studied whether DNAJB1 was found in exosomes and whether DNAJB1 exosomal content  
580 was impacted in Hdh140-JAK2ca mice. Exosomal vesicles were isolated by biochemical fractionation  
581 from the striatum of Hdh140-GFP and Hdh140-JAK2ca mice, and they did contain DNAJB1  
582 (**Supplemental Fig. 1c**). DNAJB1 normalized levels displayed a strong tendency to be higher in  
583 exosomes of Hdh140-JAK2ca mice than in Hdh140-GFP control mice ( $p = 0.056$ , **Fig. 7f**).

584 To assess whether DNAJB1 released by JAK2ca-astrocytes contributes to reduce mHTT aggregation  
585 in neurons, we generated viral vectors targeting astrocytes and encoding a dominant-negative form of

586 human *DNAJB1* (DNAJB1-DN), which prevents DNAJB1 interaction with the HSP70 chaperone<sup>42</sup>,  
587 without impacting its loading into exosomes<sup>59</sup>. DNAJB1-DN was expressed in astrocytes in Hdh140-  
588 JAK2ca and Hdh140-GFP mice (**Fig. 8a**). DNAJB1-DN, detected by its V5 tag, was confirmed to be  
589 primarily expressed in striatal astrocytes (**Fig. 8b**). JAK2ca was still able to increase GFAP levels in  
590 Hdh140 astrocytes in presence of DNAJB1-DN (**Fig. 8c**). However, co-expression of DNAJB1-DN  
591 blocked JAK2ca-mediated reduction of EM48<sup>+</sup> aggregate numbers (**Fig. 8d**) and even decreased  
592 *Ppp1r1b* mRNA levels (**Fig. 8e**).

593 Conversely, we tested whether DNAJB1 restoration was able to oppose SOCS3 detrimental effects  
594 in the LV model of mHTT overexpression. In the striatum of WT mice, we injected a viral vector  
595 targeting astrocytes and encoding a full length human *DNAJB1* (LV<sub>A</sub>-DNAJB1) with LV<sub>A</sub>-SOCS3 or  
596 LV<sub>A</sub>-GFP together with LV<sub>N</sub>-mHTT (**Fig. 8f**). DNAJB1 did not interfere with SOCS3-mediated  
597 reduction of GFAP levels in HD astrocytes (**Fig. 8g**). However, when DNAJB1 was expressed in  
598 astrocytes, SOCS3 no longer exacerbated mHTT aggregation (**Fig. 8h**), neuronal lesion (**Fig. 8i**), or  
599 reduced *Ppp1r1b* mRNA levels (**Fig. 8j**), suggesting that DNAJB1 expression in astrocytes counteracts  
600 SOCS3 deleterious effects.

601 Our results suggest that JAK2-STAT3 pathway-mediated induction of the co-chaperone DNAJB1 in  
602 reactive astrocytes helps reduce mHTT aggregation and improve neuronal alterations in HD.

603

## 604 Discussion

605 We studied how the JAK2-STAT3 pathway shapes the proteostasis response of reactive astrocytes  
606 in HD. We found that STAT3 is activated in reactive astrocytes of HD patients. Thanks to its targeted  
607 manipulation in striatal astrocytes of two complementary mouse models of HD, we show that the JAK2-  
608 STAT3 pathway controls the reactive state of astrocytes and reduces both the number and size of mHTT  
609 aggregates that form in neurons.

610 The reduction of mHTT aggregation by activation of the JAK2-STAT3 pathway in astrocytes is not  
611 due to lower mHTT expression, as *Htt* mRNA levels and Tx-soluble mHTT concentration were not  
612 reduced by JAK2ca. Importantly, JAK2ca-mediated reduction in mHTT aggregation did not trigger an  
613 increase in soluble mHTT levels either. This observation rules out the possibility that JAK2ca prevents  
614 mHTT from coalescing into aggregates or favours the accumulation of soluble mHTT after its  
615 dissociation from aggregates. Instead, activation of the JAK2-STAT3 pathway in reactive astrocytes  
616 appears to favour the full degradation of mHTT insoluble oligomers or aggregates, which could be  
617 mediated by autophagy-lysosomal removal of aggregates or chaperone-mediated extraction of mHTT  
618 and targeting to the UPS for complete clearance.

619 Indeed, transcriptomic analysis of acutely sorted astrocytes following JAK2-STAT3 pathway  
620 activation in WT and HD mice reveals extensive changes in genes linked to lysosomal degradation and  
621 the UPS. This result is in accordance with the single nuclei RNAseq (snRNAseq) analysis of astrocytes  
622 from the cingulate cortex of grade III/IV HD patients, reporting a significant enrichment in proteostasis  
623 functions<sup>5</sup>. Lysosomes and UPS are active in all brain cells and changes in expression or activity in  
624 astrocytes could be masked by larger changes in other cell-types if assessed in typical bulk tissue  
625 analyses. We thus implemented two FACS-based assays to measure cathepsins and proteasome activity  
626 specifically in astrocytes. We found that JAK2ca increases both proteolytic activities in HD astrocytes.  
627 In addition, our ability to induce mHTT expression selectively in astrocytes by viral gene transfer  
628 provides a direct demonstration that the JAK2-STAT3 pathway increases reactive astrocyte capacity to  
629 clear mHTT.

630 As aggregates form mainly in neurons, trans-cellular signalling mechanisms must take place between  
631 neurons and reactive astrocytes (**Fig. 9**). Can mHTT be transferred from neurons to reactive astrocytes  
632 where they would be degraded more efficiently? In a landmark study in *Drosophila*, it was shown that  
633 mHTT exon 1 tagged with mCherry transfers from neurons to neighbouring phagocytic glia and forms  
634 aggregates with wildtype HTT in glia<sup>60</sup>. Other studies showed that mHTT can be exchanged between  
635 brain cells in *Drosophila*, in mice<sup>61-63</sup>, and even in humans as mHTT aggregates were detected in healthy  
636 embryonic neurons grafted in the brain of HD patients<sup>64</sup>. mHTT can be packaged in exosomes of  
637 different cell types<sup>65, 66</sup> and be taken up by neighbouring cells, including neurons. Exchange of mHTT  
638 may also involve direct cell-to-cell contacts via tunnelling nanotubes<sup>67</sup> or unconventional secretory  
639 pathways<sup>68</sup>. Most studies were performed *in vitro* or in non-neuronal cells, therefore, the precise

640 mechanisms of mHTT exchange from neurons to astrocytes in the mammalian brain remain to be  
641 elucidated. Of note, a recent study showed that astrocyte-specific silencing of mHTT in a genetic HD  
642 mouse model reduces both astrocyte and neuronal mHTT aggregates<sup>20</sup>, further supporting the concept  
643 of a tight partnership between these two cell types to degrade mHTT.

644 An alternative and non-exclusive mechanism for reduced neuronal mHTT aggregation upon JAK2-  
645 STAT3 pathway activation in astrocytes, is that reactive astrocytes release proteins that promote mHTT  
646 clearance within neurons (**Fig. 9**). Our transcriptomic study shows that several chaperones are induced  
647 by JAK2ca in reactive astrocytes. In particular, DNAJB1 protein levels were higher in Hdh140-JAK2ca  
648 mice and this co-chaperone was abundant in extracellular exosomes. Chaperones are known to be  
649 released in exosomes and mediate trans-cellular proteostasis<sup>34, 59</sup>. Moreover, exosomes isolated from  
650 cultured astrocytes were shown to reduce mHTT aggregation in HD mice<sup>18</sup>. Interestingly, snRNASeq  
651 shows that *DNAJB1*, as well as other chaperones are significantly overexpressed in astrocytes from the  
652 cingulate cortex of grade III/IV HD patients<sup>5</sup> and the putamen of grade II/III patients<sup>9</sup>, supporting that  
653 this beneficial proteostasis response also occurs in astrocytes from HD patients.

654 Through its J domain, DNAJB1 interacts with HSP70 to stimulate its ATP-dependent chaperone  
655 activity<sup>69</sup>. This domain is also implicated in DNAJB1 loading into exosomes<sup>42, 59</sup>. The J domain alone  
656 cannot activate HSP70 and has a dominant-negative action on the endogenous DNAJB1<sup>42</sup>. Expression  
657 of this mutant in astrocytes abrogated JAK2ca-mediated beneficial effects in Hdh140 mice, showing  
658 DNAJB1 involvement in JAK2ca effects. Conversely, expression of DNAJB1 in astrocytes cancelled  
659 SOCS3 deleterious effects on neuronal death and transcriptional defects in the lentiviral HD model.  
660 Overall, our data strongly suggest that DNAJB1, produced by reactive astrocytes following JAK2-  
661 STAT3 pathway activation, contributes to mHTT clearance.

662 DNAJB1 was shown to be the rate-limiting chaperone to suppress aggregation of a short fragment  
663 of mHtt<sup>70</sup>. But interestingly, HSPs not only prevent mHTT aggregation but can also promote solubility  
664 of proteins trapped in aggregates like transcription factors and favour mHTT degradation by addressing  
665 it to the UPS or autophagy-lysosomes<sup>33</sup>. Of note, DNAJB1 itself was recently shown to promote  $\alpha$ -  
666 synuclein disaggregation<sup>71</sup>. HSP-mediated extraction of housekeeping proteins or mHTT itself from  
667 aggregates is expected to reduce their size, which is consistent with our observations. Therefore, HSP  
668 have multiple actions that can *in fine* protect neurons against mHTT toxicity, as shown in different  
669 experimental systems based on HSP overexpression<sup>72-74</sup>. Here, we show that neurons rely on the  
670 endogenous production of chaperones by astrocytes to reduce mHTT aggregation.

671 The toxicity of mHTT aggregates is still discussed<sup>24, 75</sup> and mHTT aggregates could have a biphasic  
672 action<sup>76</sup>. At early stages, they could trap soluble toxic mHTT and prevent its deleterious interaction with  
673 key cellular partners. Later, mHTT aggregates could be detrimental by sequestering transcription  
674 factors, housekeeping proteins or microRNAs, leading to neuronal dysfunction and necrotic death<sup>24, 77</sup>.  
675 It is important to note that most of these studies were based on *in vitro* systems allowing time-lapse  
676 monitoring of aggregates, but which cannot fully replicate the complex brain environment where

677 neurons interact with multiple glial cells and have to cope with mHTT for months, and even decades in  
678 patients. Here, in two complementary HD mouse models, we report that reduced mHTT aggregation is  
679 associated with improved neuronal features, showing that the JAK2-STAT3 pathway shapes a beneficial  
680 reactive response in striatal astrocytes. It will be important to further explore how this pathway  
681 specifically regulates other key astrocyte functions such as glutamate uptake or potassium buffering,  
682 which were shown to be altered in HD models and patients<sup>13</sup>.

683

684 In conclusion, we show that the JAK2-STAT3 pathway activates a beneficial proteostasis program  
685 in reactive astrocytes, which helps neurons handle toxic mHTT. Our study uncovers two non-mutually  
686 exclusive, bi-cellular mechanisms to reduce mHTT aggregation in HD neurons (**Fig. 9**): one relying on  
687 mHTT exchange and clearance within reactive astrocytes and the other involving the release of  
688 chaperones from reactive astrocytes to promote neuronal proteostasis. Astrocytes are not only defective  
689 in HD as usually reported, they may also acquire enhanced capacities to promote mHTT clearance and  
690 neuronal function, following activation of specific signalling cascades. Our results open new therapeutic  
691 avenues to further enhance the natural partnership between reactive astrocytes and vulnerable neurons  
692 in HD.

693

## 694 **Acknowledgments**

695 This study was supported by CEA, CNRS and grants from the French National Research Agency (grants  
696 # 2010-JCJC-1402-1, 2011-BSV4-021-03, ANR-16-TERC-0016-01 and ANR-20-CE16-0012-02 to  
697 C.E., 2011-INBS-0011 for NeurATRIS national infrastructure to P.H., as well as the *EpiHD* project  
698 ANR-17-CE12-0027 and a grant from H2020 ERA-Net for Research Programs on Rare Diseases  
699 (*TreatPolyQ* project ANR-17-RAR3-0008-01) to E.B and from Fondation maladies rares  
700 (GenOmic\_2019-0203, Program High throughput sequencing and rare diseases) to C.E. C.E. and L.A.  
701 received support from the Association Huntington France. L.A. holds a PhD fellowship from the *Region*  
702 *Ile-de-France* via the *DIM Cerveau et Pensée*. Sequencing was performed on a platform partially  
703 supported by the France Génomique national infrastructure, funded by the *Investissements d'Avenir*  
704 program managed by the French National Research Agency (ANR-10-INBS-09). The present work also  
705 benefited from Imagerie-Gif core facility supported by French National Research Agency (ANR-11-  
706 EQPX-0029/Morphoscope, ANR-10-INBS-04/FranceBioImaging; ANR-11-IDEX-0003-02/ Saclay  
707 Plant Sciences).

708 We are grateful to F. Aubry for help with initial AAV vector cloning and FACS experiments, C.  
709 Joséphine for AAV production, G. Auregan for stereotactic surgery and Dr. J. Baijer and N. Dechamps  
710 for FACS-isolation of astrocytes. We thank Prof. Déglon for helpful discussions at the beginning of the  
711 project. We acknowledge the help of V. Lavilla, and Cédric Fund on transcriptomic studies at the  
712 CNRGH. We thank Drs. K. Cambon and G. Liot for sharing their antibodies to S100 $\beta$ , VDAC and  
713 mHTT. We thank L. de Longprez for help with the Hdh140 colony, as well as Dr. N. Heck, E. Saavedra  
714 and R. Jacqmin for pilot experiments.

## 715 **Author contribution**

716 LA, CE: conception; LA, LBH, MACS, CE: design of the work; LA, LBH, PG, MACS, CD, MAP,  
717 FP, ASH, MG, MGG, MK: acquisition of data; LA, LBH, MRP, PG, NS, NR, PdIG, RO: analysis of  
718 data; LA, LBH, MRP, EBo, SB, RO, EBr, MACS, CE: interpretation of data; MCG, ND, RM, APB,  
719 GB: Provided reagents or materials; JFD, PH, EBr, CE: Provided funding; LA, CE: manuscript  
720 writing. All authors revised and approved the manuscript.

721



722 **Figures**

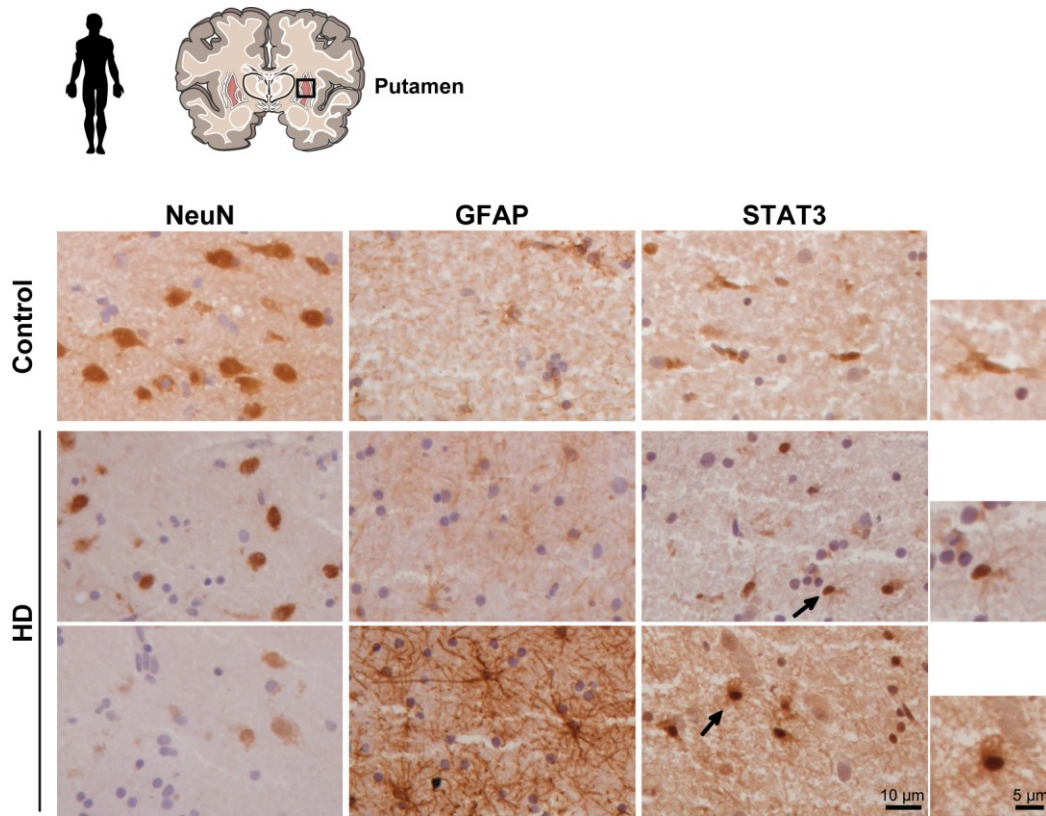

723 **Figure 1. STAT3 nuclear accumulation in the putamen of HD patients**

724 STAT3 immunoreactivity is higher in the putamen of HD patients than in control subjects, especially in  
725 regions displaying many hypertrophic GFAP<sup>+</sup> astrocytes, and major neurodegeneration, as seen with the  
726 loss NeuN staining (3<sup>rd</sup> line). STAT3 is often found accumulated in the nucleus of cells with a typical  
727 astrocyte morphology (arrows and high magnification). Representative images from 4 subjects/group.

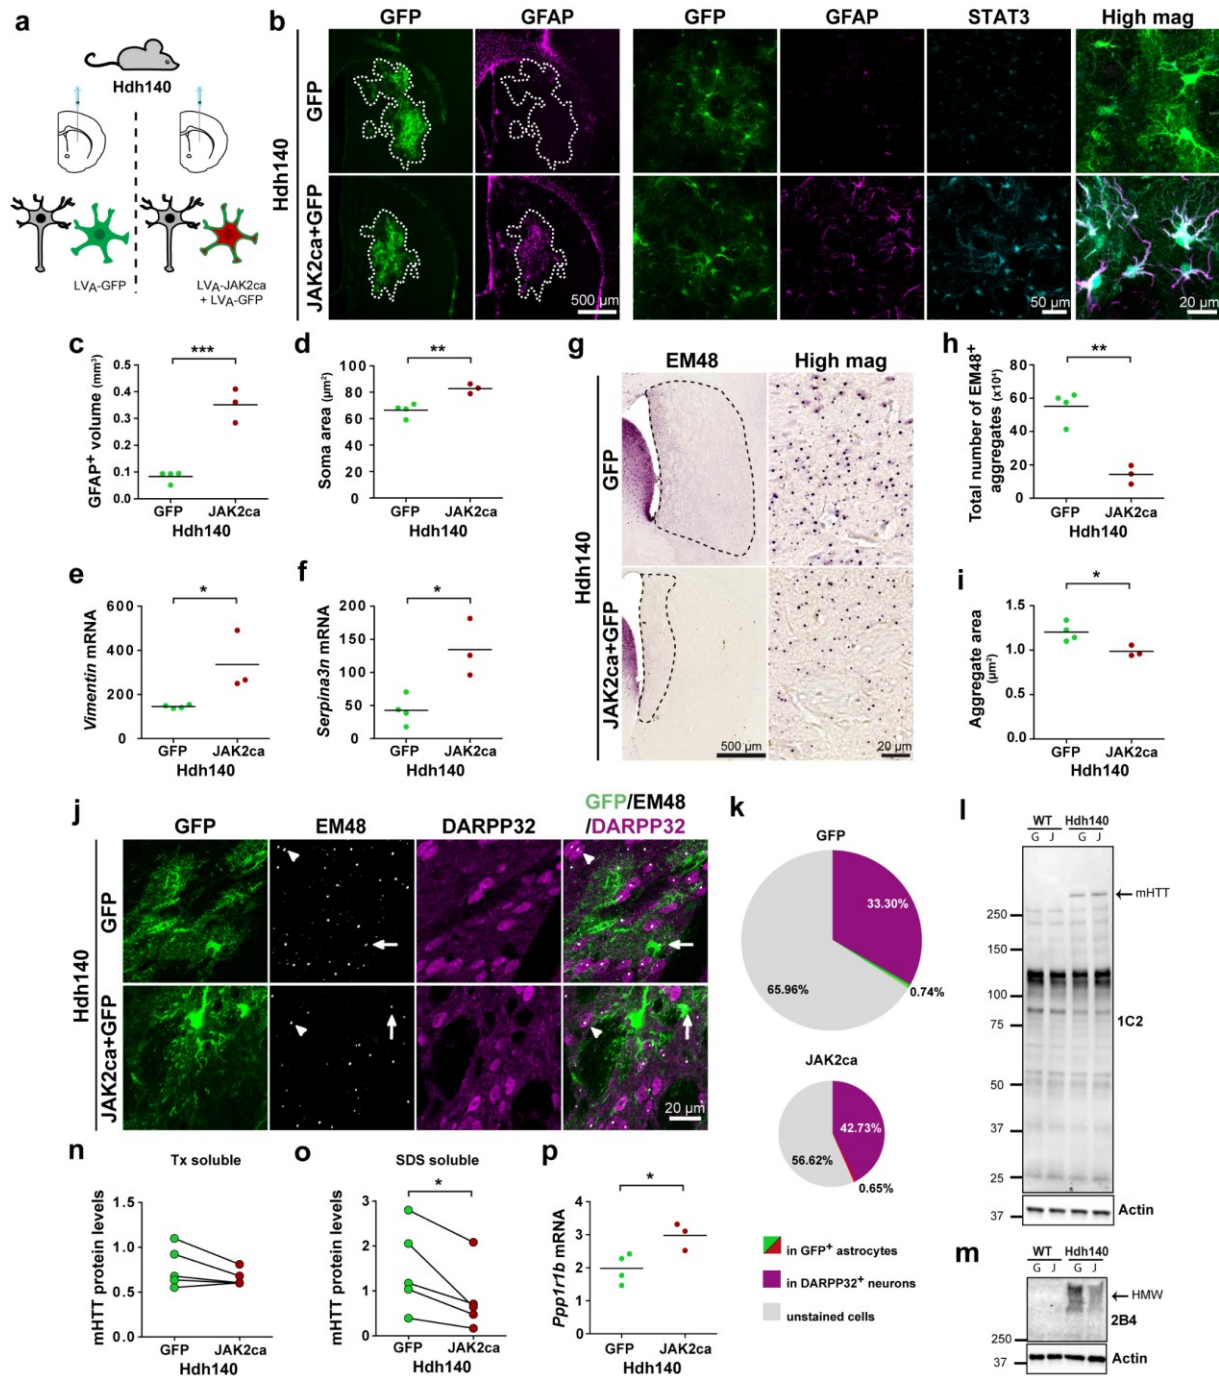

728 **Figure 2. JAK2ca induces astrocyte reactivity and reduces neuronal mHTT**

729 **aggregation in Hdh140 mice**

730 **a.** Hdh140 mice (7-9 month-old) were injected in the striatum with LV<sub>A</sub>-GFP or LV<sub>A</sub>-JAK2ca + LV<sub>A</sub>-  
 731 GFP, at the same total virus load, and their brains analysed 4 months later. **b.** Low magnification images  
 732 (left) show the GFP<sup>+</sup> transduced area (outlined, green) and GFAP staining (magenta) in the striatum of  
 733 Hdh140-GFP and Hdh140-JAK2ca mice. High magnification images (right) of astrocytes stained for  
 734 GFP (green), GFAP (magenta), and STAT3 (cyan). JAK2ca triggers STAT3 activation, as seen by its  
 735 nuclear accumulation, increases GFAP and vimentin levels and induces morphological changes in

736 astrocytes. Note that the basal expression of GFAP is nearly undetectable in Hdh140 mice, suggesting  
737 very mild reactive changes in this model. **c, d.** GFAP<sup>+</sup> volume (**c**) and soma area of GFP<sup>+</sup> astrocytes (**d**)  
738 are significantly increased by JAK2ca. **e, f.** JAK2ca increases *Vimentin* (**e**) and *Serpina3n* (**f**) mRNA  
739 levels. **g.** Bright field images of EM48<sup>+</sup> aggregates in the striatum of Hdh140-GFP and Hdh140-JAK2ca  
740 mice. The striatal region displaying EM48<sup>+</sup> aggregates is outlined on low magnification images. **h, i.**  
741 Total number (**h**) and size (**i**) of EM48<sup>+</sup> aggregates are significantly decreased by JAK2ca in the striatum  
742 of Hdh140 mice. **j.** Confocal images of striatal sections stained for GFP (green), EM48 (white) and  
743 DARPP32 (magenta). EM48<sup>+</sup> aggregates are mostly found in neurons labelled with DARPP32  
744 (arrowhead) and very rarely in GFP<sup>+</sup> astrocytes (green, arrow). **k.** JAK2ca decreases the total number  
745 of EM48<sup>+</sup> aggregates, but the distribution of EM48<sup>+</sup> aggregates between GFP<sup>+</sup> astrocytes and  
746 DARPP32<sup>+</sup> neurons is not changed. **l, n.** Immunoblotting on the Tx-soluble fraction of mHTT with the  
747 1C2 antibody. Similar levels of mHTT are detected in Hdh140-GFP and Hdh140-JAK2ca mice, while  
748 mHTT is undetectable in WT mice. There is no mHTT cleavage fragments detected by this antibody in  
749 both Hdh140-GFP and Hdh140-JAK2ca mice. **m, o.** Immunoblotting on the SDS-soluble fraction of  
750 high molecular weight species (HMW) of mHTT with the 2B4 antibody. JAK2ca decreases the levels  
751 of insoluble HMW mHTT species in Hdh140 mice. Band intensity was normalized to actin. **p.** Striatal  
752 *Ppp1r1b* mRNA levels are higher in Hdh140-JAK2ca mice than in Hdh140-GFP mice. **c-f, h, i, p.**  
753 Student *t*-test. N = 3-5/group. **n, o.** Paired *t*-test. N = 5/group.

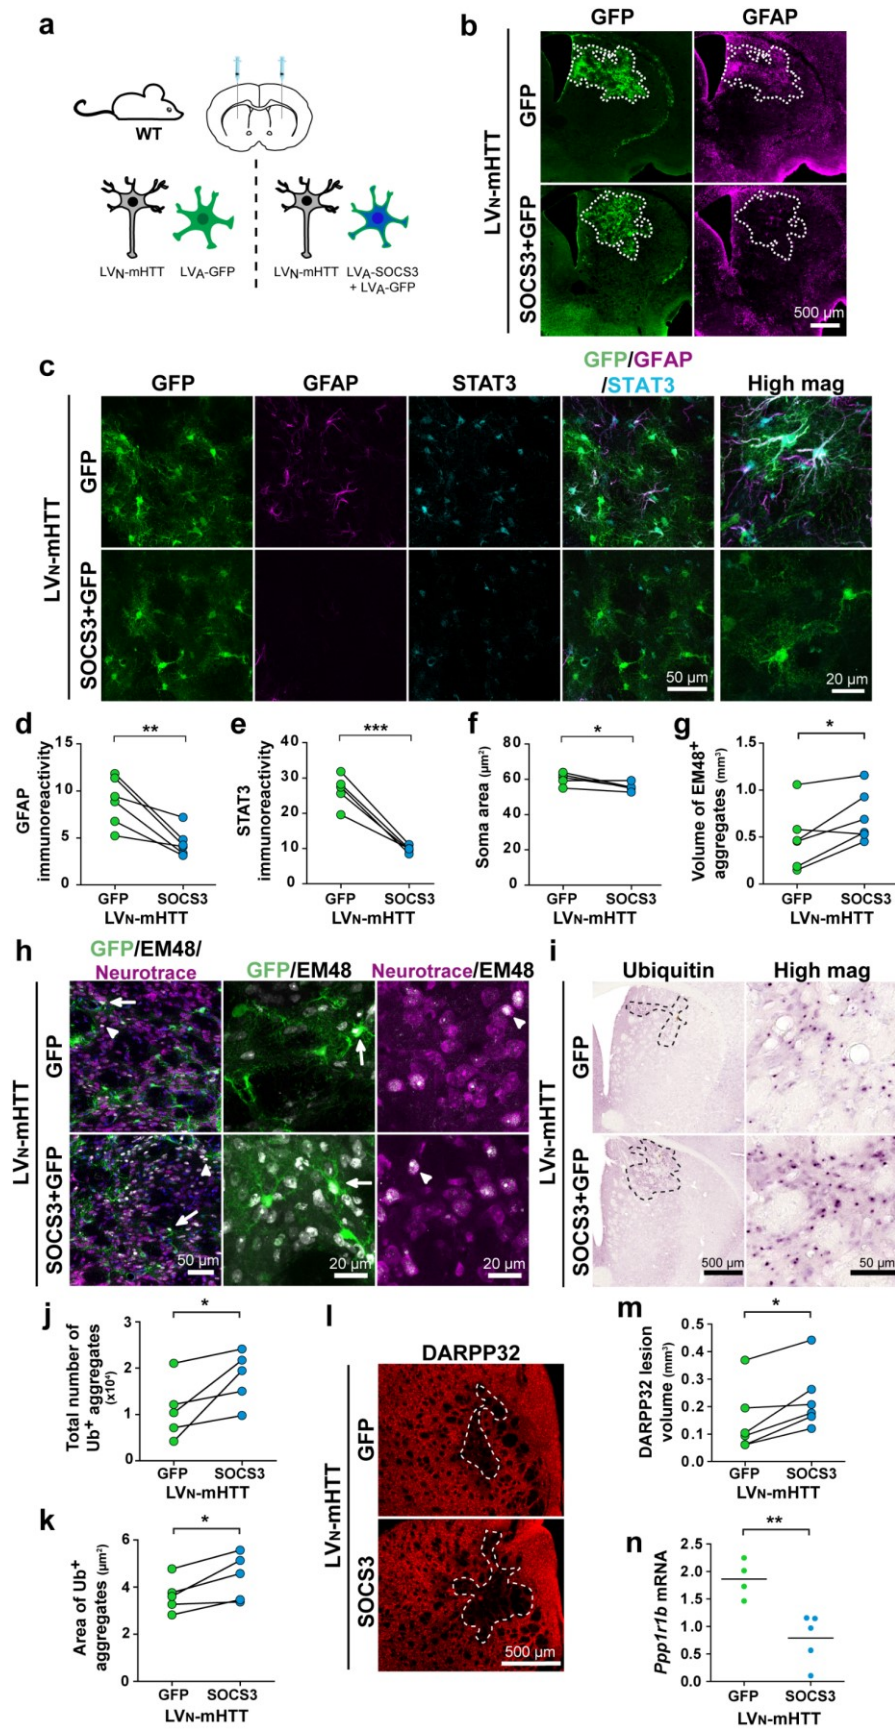

754 **Figure 3. SOCS3-inhibition of the JAK2-STAT3 pathway in astrocytes increases**  
755 **the number and size of neuronal mHTT aggregates**

756 **a.** Two month-old WT mice were injected with LV<sub>N</sub>-mHTT + LV<sub>A</sub>-GFP in one striatum and with LV<sub>N</sub>-  
757 mHTT + LV<sub>A</sub>-SOCS3 + LV<sub>A</sub>-GFP in the contralateral striatum, at the same total virus load. Their brains  
758 were analysed 6 weeks later. **b.** Low magnification images show the transduced GFP<sup>+</sup> area (green,  
759 outlined) in the striatum and immunostaining for GFAP (magenta). **c.** High magnification confocal  
760 images of astrocytes stained for GFP (green), GFAP (magenta) and STAT3 (cyan). **d-f.**  
761 Immunoreactivity for GFAP (**d**) and STAT3 (**e**), as well as astrocyte soma area (**f**) are significantly  
762 decreased by SOCS3. **g.** The striatal volume with EM48<sup>+</sup> aggregates is significantly increased by  
763 SOCS3. **h.** Confocal images of striatal sections stained for GFP (green), EM48 (white), neurotrace  
764 (magenta) and DAPI (blue). Large EM48<sup>+</sup> aggregates of mHTT are mostly found in neurons stained for  
765 neurotrace, occupying their entire nucleus (arrowhead). Only few GFP<sup>+</sup> astrocytes display an EM48<sup>+</sup>  
766 aggregate (arrow). **i.** Immunolabeling for ubiquitin (Ub) shows Ub<sup>+</sup> aggregates in the striatum (delimited  
767 with black dots). **j.** The number of Ub<sup>+</sup> inclusions is significantly increased by SOCS3. **k.** Ub<sup>+</sup> inclusions  
768 are larger in the striatum injected with LV<sub>A</sub>-SOCS3 than LV<sub>A</sub>-GFP. **l.** Images of striatal sections stained  
769 for DARPP32 (red) showing the striatal lesion caused by mHTT (dotted lines). **m.** Striatal DARPP32-  
770 lesions are significantly larger in the SOCS3 group. **n.** SOCS3 decreases mRNA levels of the neuronal  
771 transcripts *Ppp1r1b* (*Darpp32*). **d-g, k.** Paired *t*-test. N = 5-6/group. **j, m.** Wilcoxon paired test. N = 5-  
772 6/group. **n.** Student *t*-test. N = 4-5/group.

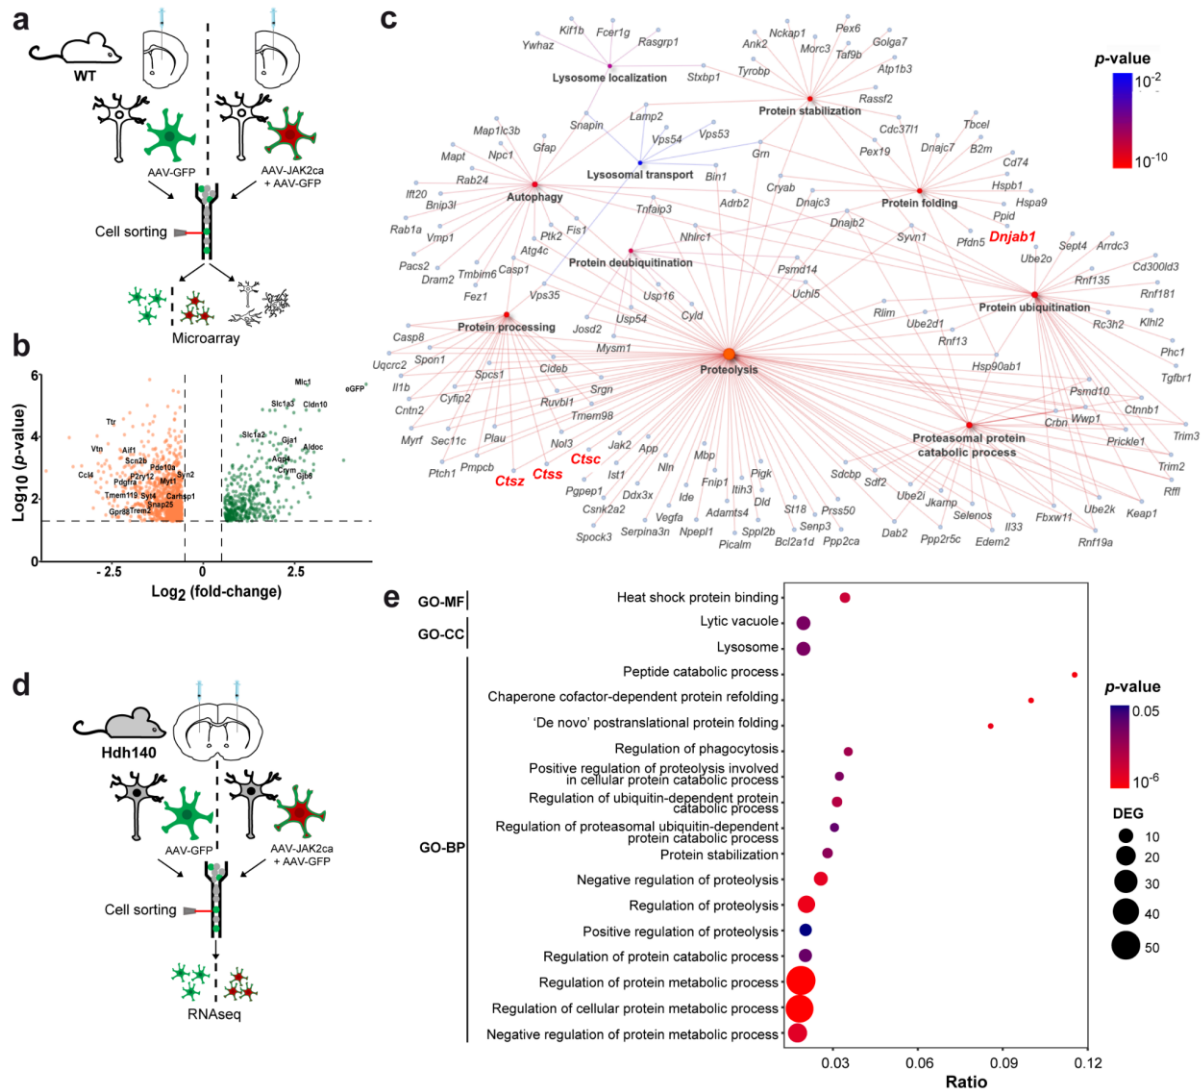

773 **Figure 4. JAK2ca regulates the expression of proteostasis genes in astrocytes**

774 **a.** Two month-old WT mice were injected in the striatum with AAV-GFP or AAV-JAK2ca + AAV-GFP (N = 4/group), at the same total virus load. After 2 months, GFP<sup>+</sup> striatal astrocytes were acutely  
775 sorted and their transcriptome analysed by microarray. **b.** Validation of astrocyte isolation. The volcano  
776 plot shows the 1,415 differentially expressed genes between GFP<sup>+</sup> astrocytes and GFP<sup>-</sup> cells in WT-GFP  
777 mice (in green overexpressed in GFP<sup>+</sup> cells; in orange, overexpressed in GFP<sup>-</sup> cells). eGFP and  
778 established cell-type specific markers are shown. GFP<sup>+</sup> cells express typical astrocyte markers while  
779 GFP<sup>-</sup> cells express markers for microglial cells, neurons, cells of the oligodendrocyte lineage and  
780 endothelial cells. **c.** GO analysis on the list of JAK2ca-regulated genes in GFP<sup>+</sup> astrocytes reveals a  
781 significant enrichment in several biological processes linked to autophagy/lysosome or UPS and in  
782 molecular functions linked to chaperones. Network plot with the genes involved in the selected GO  
783 pathways. **d.** Hdh140 mice (8-10 month-old) were injected in the striatum with AAV-GFP or AAV-  
784 JAK2ca + AAV-GFP, at the same total virus load. After 4 months, GFP<sup>+</sup> striatal astrocytes were  
785 collected and analysed by RNAseq. **e.** GO analysis reveals a significant enrichment in genes involved  
786 in molecular functions (MF), cellular components (CC) and biological processes (BP) linked to  
787

788 proteostasis. The x axis represents the ratio of the number of differentially expressed genes over the total  
789 number of genes belonging to a GO entry, DEG = differentially expressed genes. **b-c.** N = 4/group. **e.**  
790 N = 5-6/group.

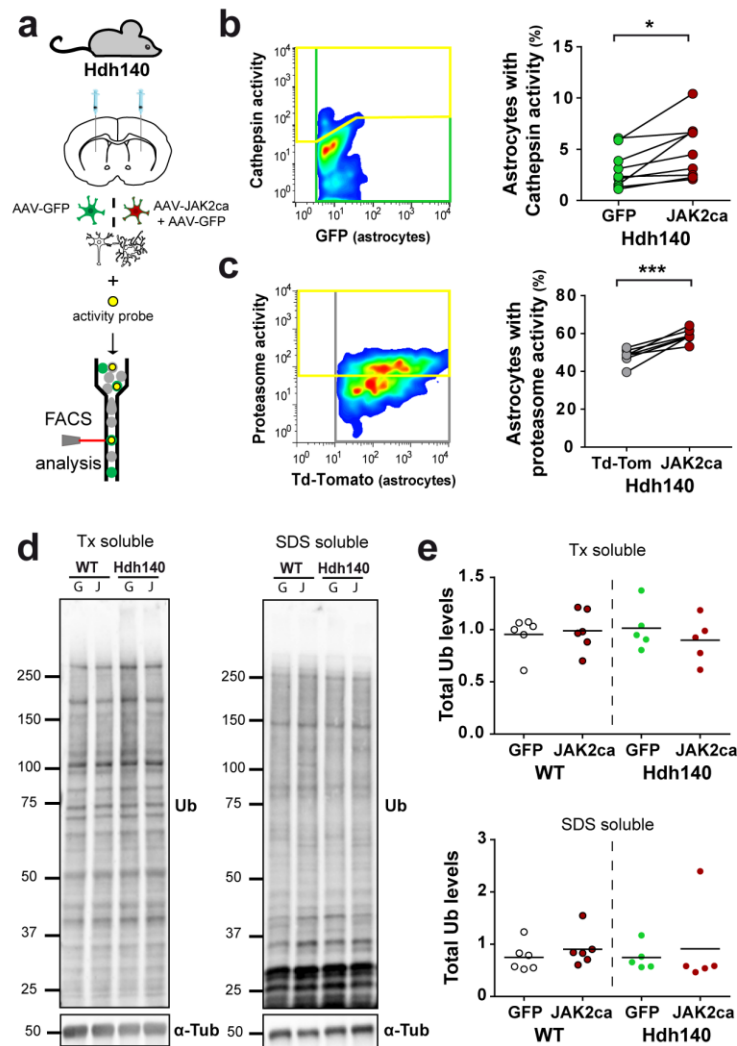

791 **Figure 5. JAK2ca increases cathepsin and proteasome activities in HD striatal**  
 792 **astrocytes**

793 **a-c.** The striatum of Hdh-JAK2ca mice and their control Hdh140-GFP or Hdh140-Td-Tomato was  
 794 collected, cells dissociated and incubated with a quenched fluorescent pan-cathepsin activity probe (**b**)  
 795 or a proteasome activity probe (**c**). The percentage of GFP<sup>+</sup> astrocytes with cathepsin activity (**b**) or the  
 796 percentage of Td-Tomato<sup>+</sup> astrocytes with proteasome activity (**c**) was quantified in each mouse.  
 797 Hdh140-JAK2ca mice display a higher percentage of astrocytes with cathepsin or proteasome activity.  
 798 **d, e.** Immunoblotting for Ub was performed on striatal Tx-soluble and SDS-soluble fractions from WT-  
 799 GFP, WT-JAK2ca, Hdh140-GFP and Hdh140-JAK2ca mice. Immunoreactivity pattern and total Ub  
 800 levels are not different between groups. Band intensity was normalized to  $\alpha$ -tubulin ( $\alpha$ -tub). **b, c.** Paired  
 801 *t*-test on *arcsine*-transformed data. **b.** N = 9/group. **c.** N = 7/group. **d.** ANOVA. N = 5-6/group.



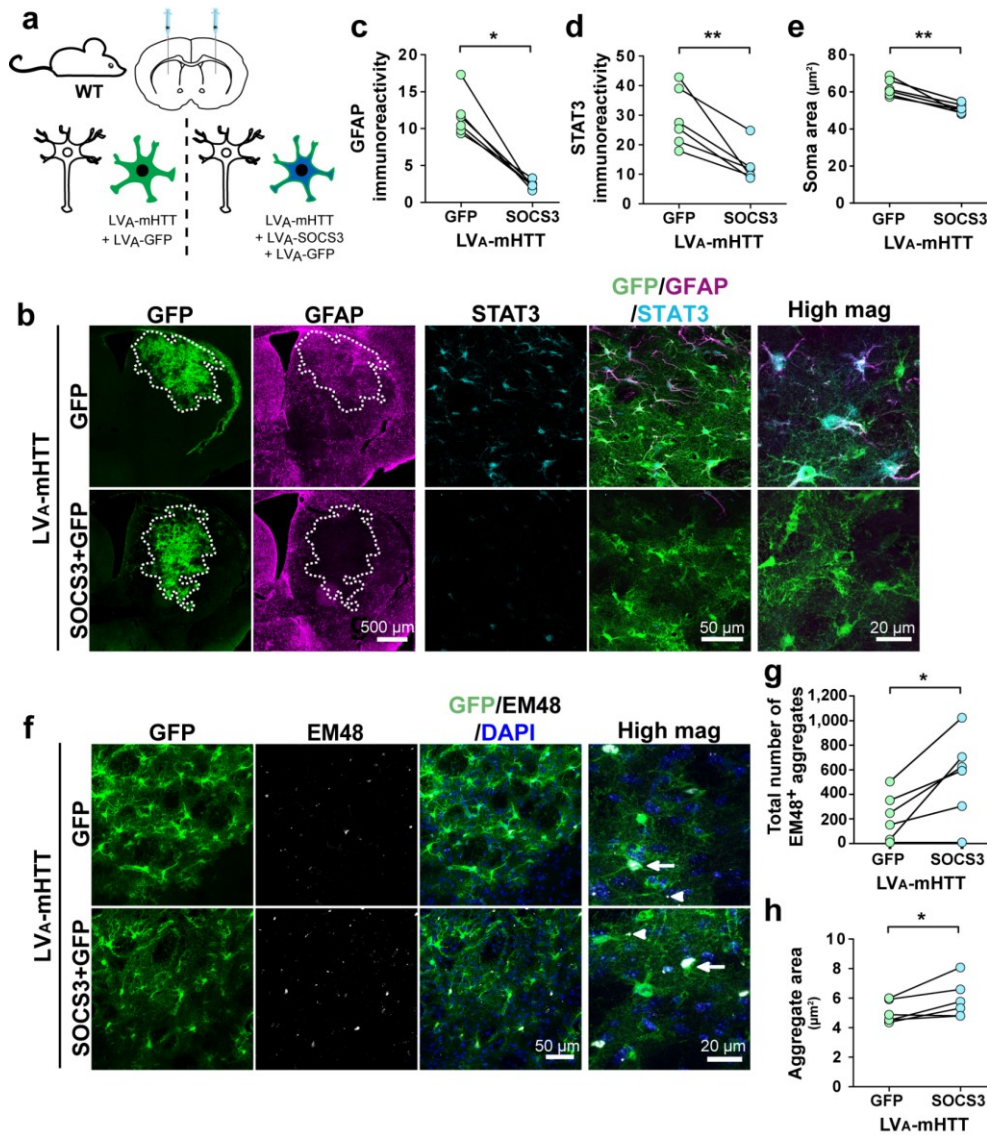

802 **Figure 6. The JAK2-STAT3 pathway increases the intrinsic proteolytic capacity of**  
 803 **HD astrocytes**

804 **a.** Two month-old WT mice were injected in one striatum with LV<sub>A</sub>-mHTT and LV<sub>A</sub>-GFP and the  
 805 contralateral striatum with LV<sub>A</sub>-mHTT, LV<sub>A</sub>-SOCS3 and LV<sub>A</sub>-GFP (same total viral load) to force  
 806 mHTT expression in astrocytes. Their brains were analysed 6 weeks later. **b.** Low magnification images  
 807 showing GFP<sup>+</sup> transduced area (outlined, green) and GFAP staining (magenta) in the mouse striatum.  
 808 Confocal images of striatal sections stained for GFP (green), GFAP (magenta) and STAT3 (cyan).  
 809 SOCS3 reduces GFAP immunoreactivity and nuclear accumulation of STAT3 in astrocytes. **c-e.**  
 810 Quantification of GFAP immunoreactivity (**c**), STAT3 immunoreactivity (**d**) and astrocyte soma area  
 811 (**e**). SOCS3 significantly decreases all these parameters. **f.** Confocal images of striatal sections stained  
 812 for GFP (green), EM48 (white) and DAPI (blue). Large EM48<sup>+</sup> aggregates form in astrocyte nucleus  
 813 (arrow), while small aggregates are mainly found in astrocyte processes (arrowhead). **g, h.** The total

814 number (**g**) and the size (**h**) of EM48<sup>+</sup> aggregates are significantly increased by SOCS3. **c.** Wilcoxon  
815 paired test. **d, e, g, h.** Paired *t*-test. N = 6/group.

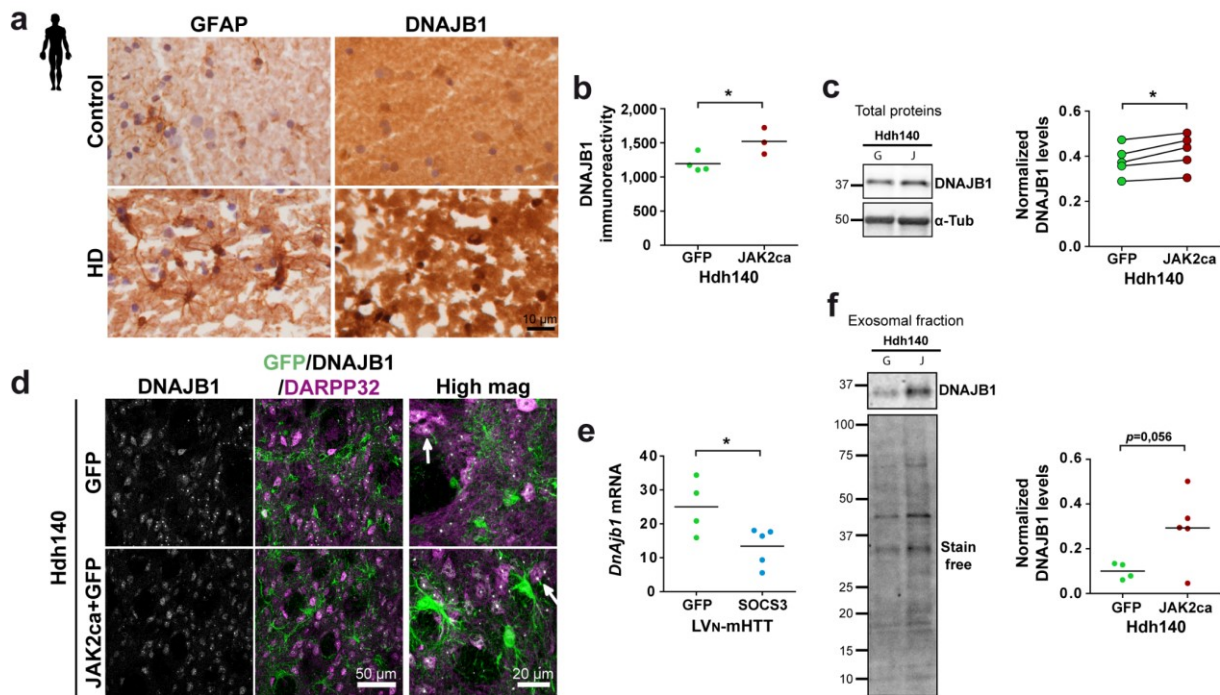

816 **Figure 7. The JAK2-STAT3 pathway increases DNAJB1 expression in astrocytes**

817 **a.** DNAJB1 display a strong immunoreactivity in the degenerative putamen region that is filled with  
 818 GFAP<sup>+</sup> astrocytes in HD patients. **b, c.** Immunostaining (**b**) and immunoblotting (**c**) show higher  
 819 DNAJB1 protein levels in the striatum of Hdh140-JAK2ca mice than Hdh140-GFP mice. Band intensity  
 820 was normalized to  $\alpha$ -tubulin ( $\alpha$ -tub). **d.** Confocal images of striatal sections stained for GFP (green),  
 821 DNAJB1 (white) and DARPP32 (magenta). DNAJB1 displays a diffuse cytosolic staining and forms  
 822 small nuclear inclusions in neurons (arrow) of Hdh140 mice. **e.** *Dnajb1* mRNA levels are significantly  
 823 decreased by SOCS3 in LV<sub>N</sub>-mHTT mice. **f.** DNAJB1 is present in exosomes isolated from Hdh140  
 824 striata and its levels, normalized by stain free staining, tend to be higher in Hdh140-JAK2ca than  
 825 Hdh140-GFP exosomes. **b, e, f.** Student *t*-test. N = 3-5/group. **c.** Paired *t*-test. N = 5/group.

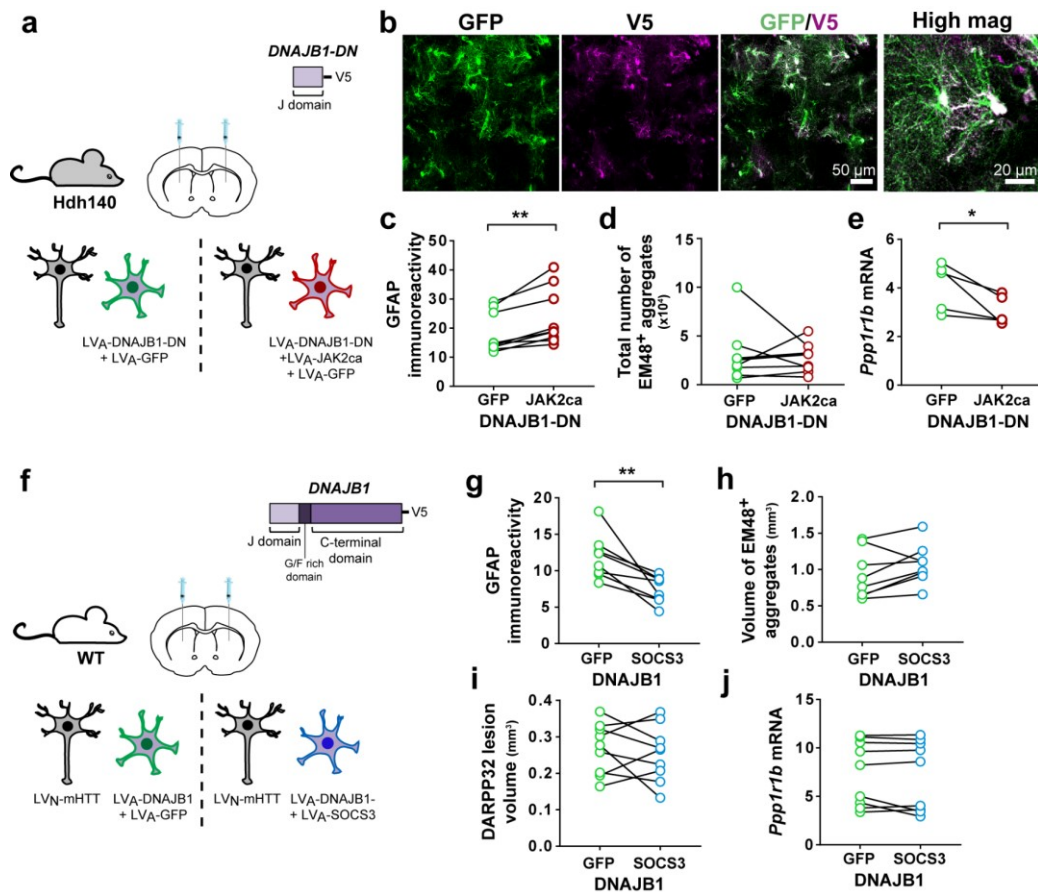

826 **Figure 8. DNAJB1 is involved in the anti-aggregation effects of the JAK2-STAT3**  
 827 **pathway**

828 **a.** Hdh140 mice (8-9 month-old) were injected in one striatum with LV<sub>A</sub>-GFP + LV<sub>A</sub>-DNAJB1-DN and  
 829 with LV<sub>A</sub>-JAK2ca + LV<sub>A</sub>-GFP + LV<sub>A</sub>-DNAJB1-DN in the contralateral striatum, at the same total virus  
 830 load. Their brains were analysed 4 months later. **b.** Representative confocal images showing striatal  
 831 sections stained for GFP (green) and V5 (magenta) in astrocytes. **c.** JAK2ca increases GFAP  
 832 immunoreactivity in astrocytes overexpressing DNAJB1-DN in Hdh140 mice. **d.** In presence of  
 833 DNAJB1-DN, the total number of EM48<sup>+</sup> aggregates is no longer decreased by JAK2ca. **e.** *Ppp1r1b*  
 834 mRNA levels are significantly reduced by JAK2ca in Hdh140 mice expressing DNAJB1-DN. **f.** Two  
 835 month-old WT mice were injected in one striatum with LV<sub>N</sub>-mHTT + LV<sub>A</sub>-GFP + LV<sub>A</sub>-DNAJB1 and  
 836 the contralateral striatum with LV<sub>N</sub>-mHTT + LV<sub>A</sub>-SOCS3 + LV<sub>A</sub>-DNAJB1, at the same total virus load  
 837 and analysed 6 weeks later. **g.** SOCS3 reduces GFAP immunoreactivity in LV<sub>N</sub>-mHTT mice, even in  
 838 presence of DNJAB1. **h.** SOCS3 no longer increases the EM48<sup>+</sup> volume when astrocytes co-express  
 839 DNAJB1. **i, j.** Likewise, striatal DARPP32<sup>-</sup> lesions (**i**) and *Ppp1r1b* mRNA levels (**j**) are no longer  
 840 different between the two groups. **c-e, j.** Wilcoxon paired test. N = 8/group (**c, d**). N=5/group (**e**). **g-h.**  
 841 Paired *t*-test. N = 9/group.

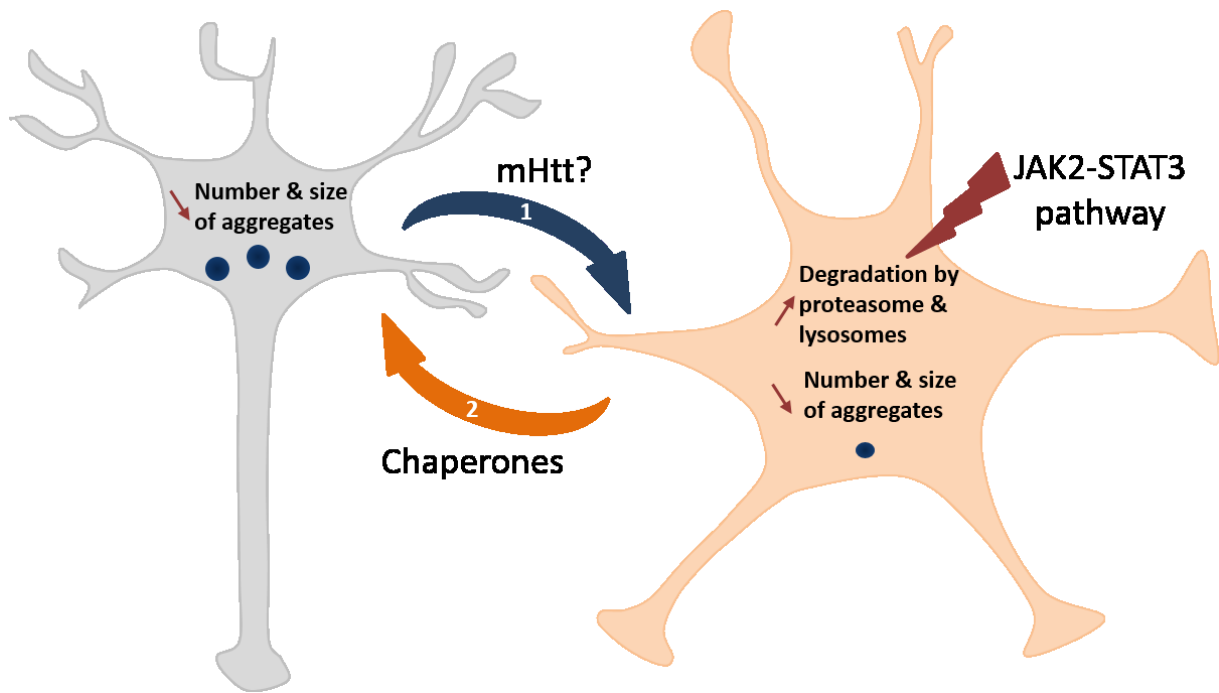

842 **Figure 9. Working model: A bi-directional communication between JAK2-**  
843 **STAT3-induced reactive astrocytes and neurons to promote proteostasis in HD**

844 The JAK2-STAT3 pathway induces a reactive response in striatal astrocytes and activates a  
845 transcriptional program that promotes proteostasis, reduces mHTT aggregation and improves neuronal  
846 status. Two complementary and non-exclusive mechanisms involving striatal neurons and JAK2-  
847 STAT3-dependent reactive astrocytes may take place. **1.** Reactive astrocytes display a higher intrinsic  
848 proteolytic activity that promotes mHTT degradation. Neurons could derive their mHTT to astrocytes  
849 for clearance. The exact mechanisms and the form of mHTT exchanged (e.g. monomers, fibrils, cleaved  
850 fragments) remain to be determined. **2.** Reactive astrocytes over-express chaperones such as DNAJB1  
851 that can be released in exosomes and promote proteostasis within neurons.

852 **Table 1. STAT3 involvement in gene regulation in HD astrocytes.**

| <b>Tool</b>              | <b>STAT3 rank among all significant transcription factors</b> | <b>p value<br/>(provided by each tool)</b> |
|--------------------------|---------------------------------------------------------------|--------------------------------------------|
| <b>ChEA3-Enrichr</b>     | 53/1122                                                       | 1.69E-22                                   |
| <b>ChEA3-ENCODE</b>      | 96/104                                                        | 2.11E-2                                    |
| <b>ChEA3-ReMap Atlas</b> | 11/123                                                        | 1.91E-5                                    |
| <b>HOMER</b>             | 25/55                                                         | 1.00E-9                                    |
| <b>TRANSFAC</b>          | 46/75                                                         | 2.53E-6                                    |

853 STAT3 is identified among potential upstream transcription factors that regulate gene expression in  
854 HD astrocytes. Data from Al-Dalahmah *et al.* <sup>5</sup>.

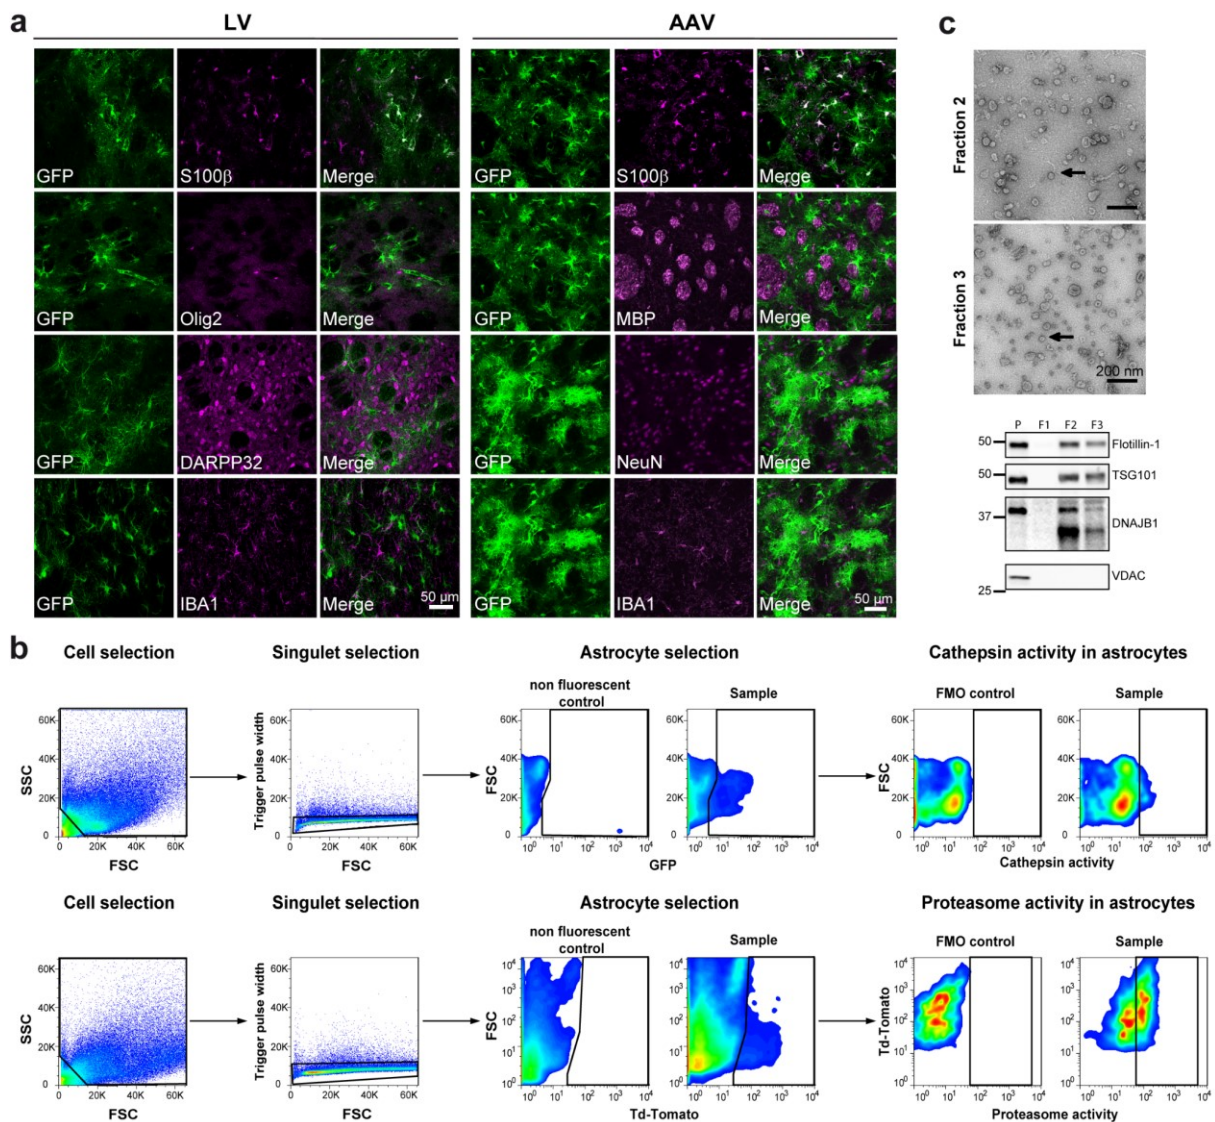

## 855 Supplemental figure 1. Validation of experimental procedures

856 **a. Validation of astrocyte transduction by viral vectors.** After injection of LV or AAV encoding GFP  
 857 and targeting astrocytes in the mouse striatum, GFP<sup>+</sup> cells (green) co-express the astrocytic markers  
 858 S100 $\beta$ , but not IBA1, NeuN, DARPP32, MBP or Olig2 (magenta), which are specific markers for  
 859 microglia, neurons, oligodendrocyte or cells of the oligodendrocyte lineage respectively, demonstrating  
 860 selective astrocyte tropism of both vectors. **b. Gating strategy for cathepsin and proteasome activity**  
 861 **measurement on dissociated cells.** Cells were gated on a side scatter/forward scatter plot, singlets were  
 862 selected and then GFP<sup>+</sup> or Td-Tomato<sup>+</sup> astrocytes were gated based on a control non-fluorescent sample.  
 863 Finally, the percentage of GFP<sup>+</sup>/cathepsin<sup>+</sup> or Td-Tomato<sup>+</sup>/Proteasome<sup>+</sup> astrocytes was quantified in  
 864 each mouse after setting the gates on a sample processed similarly without fluorescent activity probe  
 865 (FMO control). **c. Purity of the exosomal fractions.** TEM of fractions 2 and 3 (F2, F3) obtained from  
 866 the striatum of control mice evidences many circular vesicles with the typical size and shape of  
 867 exosomes (arrow). Immunoblotting confirms that Flotillin-1 and TSG101, two exosomal proteins are

868 enriched in F2 and F3, while VDAC, a mitochondrial protein, is only found in the first pellet (P) of  
869 total/brain homogenate. DNAJB1 is abundant in exosomal fractions.



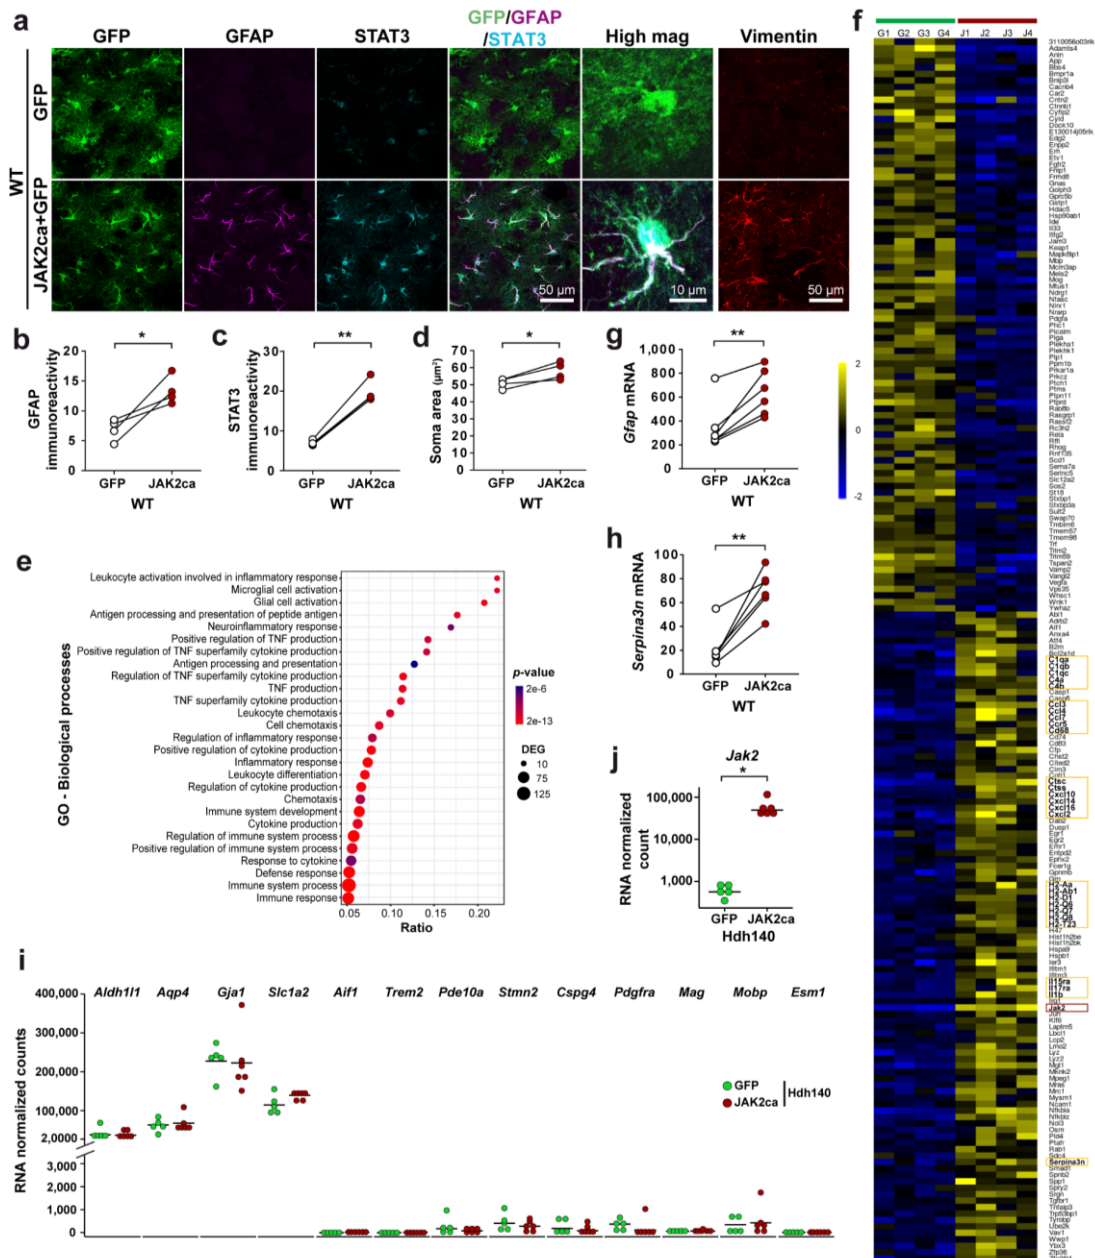

870 **Supplemental figure 2. JAK2ca induces reactive changes in striatal astrocytes.**

871 **a-h.** Mice were injected as in **Fig. 4a**. **a-d.** Representative confocal images showing brain sections  
872 stained for GFP (green), GFAP (magenta), STAT3 (cyan) and vimentin (red) in WT-GFP and WT-  
873 JAK2ca mice (**a**). JAK2ca increases GFAP and vimentin immunoreactivity, triggers STAT3  
874 accumulation in the nucleus and induces soma hypertrophy in astrocytes (quantification in **b, c, d**). **e, f.**  
875 Microarray analysis on FACS-sorted GFP-astrocytes (G) and JAK2ca-astrocytes (J). GO analysis  
876 identifies several biological processes linked to immunity and inflammation. DEG = differentially  
877 expressed genes (**e**). JAK2ca induces the expression of many genes involved in these biological  
878 processes (**f**). Color scale represents mean-centered expression (log<sub>2</sub>-transformed). Cytokines and  
879 chemokines, antigen presentation molecules and complement factors are highlighted in yellow boxes.  
880 Note that *Jak2* is also found upregulated (red box). **g, h.** JAK2ca-induction of *Gfap* (**g**) and *Serpina3n*

881 **(h)** mRNA is validated by qPCR on bulk striatal samples prepared from GFP- and JAK2ca-mice. **i, j.**  
882 Mice were injected as in **Fig. 4d**. Sorted astrocytes from both Hdh140-GFP and Hdh140-JAK2ca mice  
883 express high levels of several astrocyte specific genes, while several markers of other cell types are  
884 barely detectable. **j.** *Jak2* mRNA are increased 100 fold in JAK2ca-astrocytes. **b-d, f-h.** Paired *t*-test. **b-**  
885 **d.** N = 4/group. **g, h.** N = 6/group. **i-j.** N = 5-6/group.

886 **Supplemental table 1: Sequences of RT-qPCR primers.**

| Gene             | Forward primer          | Reverse primer           |
|------------------|-------------------------|--------------------------|
| <i>Dnajb1</i>    | CCTACGACGTGCTCAGCGAC    | ATGGGGGTCTCCGTGGAAT      |
| <i>Eef1</i>      | CTACCCTCCACTTGGTCGCTT   | GCAACTGTCTGCCTCATGTCAC   |
| <i>Erp29</i>     | CCTTCCCTTGGACACAGTCACT  | GTCGAACTTCACCAAGACGAACTT |
| <i>Gfap</i>      | ACGACTATCGCCGCCAACT     | GCCGCTCTAGGGACTCGTTC     |
| <i>Htt</i>       | GCCGCTCCGCCTCAAC        | ATAGCGATGCCCAAGAGTTTC    |
| <i>mHTT</i>      | GCCGCTCCTCAGCTTC        | ATAGCGATGCCCAAGAGTTTC    |
| <i>Ppia</i>      | ATGGCAAATGCTGGACCAAA    | GCCTTCTTTCACCTTCCCAAA    |
| <i>Ppp1r1b</i>   | TCGGAGGAAGAGGATGAGTT    | GGGGCTGGGATGCTGAGGTT     |
| <i>Rpl13a</i>    | CTGAAGCCTACCAGAAAGTTTGC | GGTACTTCCACCCGACCTCAT    |
| <i>Serpina3n</i> | CAACCTTACAGGCCAACCCAT   | GGGCACCAAGTAGTCCTAGATGCT |
| <i>Vimentin</i>  | TCGAGGTGGAGCGGGACAAC    | TGCAGGGTGCTTTCGGCTTC     |

887 **Supplemental table 2: Information on human samples.**

| Group                       | Cause of death            | Sex    | Age (y) | Post mortem delay (h:min) | Brain weight (g) |
|-----------------------------|---------------------------|--------|---------|---------------------------|------------------|
| <b>Non-demented Control</b> | Mediastinum carcinoma     | Male   | 45      | 08:50                     | 1440             |
|                             | Euthanasia (Pain)         | Female | 55      | 07:30                     | 1260             |
|                             | Euthanasia (Pain)         | Female | 60      | 05:30                     | 1215             |
|                             | Myocardial infarction     | Male   | 73      | 09:10                     | 1500             |
| <b>HD</b>                   | Euthanasia                | Female | 38      | 05:40                     | 1140             |
|                             | Euthanasia                | Female | 57      | 06:40                     | 1280             |
|                             | Respiratory insufficiency | Female | 64      | 05:00                     | 975              |
|                             | Euthanasia                | Male   | 71      | 04:25                     | 1320             |

## References

1. Tabrizi, S.J., Flower, M.D., Ross, C.A. & Wild, E.J. Huntington disease: new insights into molecular pathogenesis and therapeutic opportunities. *Nature reviews. Neurology* **16**, 529-546 (2020).
2. The Huntington study group. A novel gene containing a trinucleotide repeat that is expanded and unstable on Huntington's disease chromosomes. The Huntington's Disease Collaborative Research Group. *Cell* **72**, 971-983 (1993).
3. DiFiglia, M., *et al.* Aggregation of huntingtin in neuronal intranuclear inclusions and dystrophic neurites in brain. *Science* **277**, 1990-1993 (1997).
4. Jansen, A.H., *et al.* Frequency of nuclear mutant huntingtin inclusion formation in neurons and glia is cell-type-specific. *Glia* **65**, 50-61 (2017).
5. Al-Dalahmah, O., *et al.* Single-nucleus RNA-seq identifies Huntington disease astrocyte states. *Acta neuropathologica communications* **8**, 19 (2020).
6. Vonsattel, J.P., *et al.* Neuropathological classification of Huntington's disease. *Journal of neuropathology and experimental neurology* **44**, 559-577 (1985).
7. Selkoe, D.J., Salazar, F.J., Abraham, C. & Kosik, K.S. Huntington's disease: changes in striatal proteins reflect astrocytic gliosis. *Brain Res* **245**, 117-125 (1982).
8. Faideau, M., *et al.* In vivo expression of polyglutamine-expanded huntingtin by mouse striatal astrocytes impairs glutamate transport: a correlation with Huntington's disease subjects. *Hum Mol Genet* **19**, 3053-3067 (2010).
9. Lee, H., *et al.* Cell Type-Specific Transcriptomics Reveals that Mutant Huntingtin Leads to Mitochondrial RNA Release and Neuronal Innate Immune Activation. *Neuron* **107**, 891-908 e898 (2020).
10. Verkhratsky, A. & Nedergaard, M. Physiology of Astroglia. *Physiological reviews* **98**, 239-389 (2018).
11. Khakh, B.S., *et al.* Unravelling and Exploiting Astrocyte Dysfunction in Huntington's Disease. *Trends Neurosci* **40**, 422-437 (2017).
12. Lievens, J.C., *et al.* Impaired glutamate uptake in the R6 Huntington's disease transgenic mice. *Neurobiol Dis* **8**, 807-821 (2001).
13. Tong, X., *et al.* Astrocyte Kir4.1 ion channel deficits contribute to neuronal dysfunction in Huntington's disease model mice. *Nat Neurosci* **17**, 694-703 (2014).
14. Hsiao, H.Y., *et al.* Aberrant astrocytes impair vascular reactivity in Huntington disease. *Ann Neurol* **78**, 178-192 (2015).
15. Rebec, G.V., Barton, S.J. & Ennis, M.D. Dysregulation of ascorbate release in the striatum of behaving mice expressing the Huntington's disease gene. *J Neurosci* **22**, RC202 (2002).
16. Hong, Y., Zhao, T., Li, X.J. & Li, S. Mutant Huntingtin Impairs BDNF Release from Astrocytes by Disrupting Conversion of Rab3a-GTP into Rab3a-GDP. *J Neurosci* **36**, 8790-8801 (2016).
17. Wojtowicz, A.M., Dvorzhak, A., Semtner, M. & Grantyn, R. Reduced tonic inhibition in striatal output neurons from Huntington mice due to loss of astrocytic GABA release through GAT-3. *Frontiers in neural circuits* **7**, 188 (2013).
18. Hong, Y., Zhao, T., Li, X.J. & Li, S. Mutant Huntingtin Inhibits alphaB-Crystallin Expression and Impairs Exosome Secretion from Astrocytes. *J Neurosci* **37**, 9550-9563 (2017).
19. Yu, X., *et al.* Context-Specific Striatal Astrocyte Molecular Responses Are Phenotypically Exploitable. *Neuron* (2020).
20. Diaz-Castro, B., Gangwani, M.R., Yu, X., Coppola, G. & Khakh, B.S. Astrocyte molecular signatures in Huntington's disease. *Science translational medicine* **11** (2019).
21. Ceyzeriat, K., Abjean, L., Carrillo-de Sauvage, M.A., Ben Haim, L. & Escartin, C. The complex STATes of astrocyte reactivity: How are they controlled by the JAK-STAT3 pathway? *Neuroscience* **330**, 205-218 (2016).
22. Ben Haim, L., *et al.* The JAK/STAT3 pathway is a common inducer of astrocyte reactivity in Alzheimer's and Huntington's diseases. *J Neurosci* **35**, 2817-2829 (2015).
23. Schaffar, G., *et al.* Cellular toxicity of polyglutamine expansion proteins: mechanism of transcription factor deactivation. *Molecular cell* **15**, 95-105 (2004).

24. Hosp, F., *et al.* Spatiotemporal Proteomic Profiling of Huntington's Disease Inclusions Reveals Widespread Loss of Protein Function. *Cell reports* **21**, 2291-2303 (2017).
25. Arrasate, M., Mitra, S., Schweitzer, E.S., Segal, M.R. & Finkbeiner, S. Inclusion body formation reduces levels of mutant huntingtin and the risk of neuronal death. *Nature* **431**, 805-810 (2004).
26. Ortega, Z. & Lucas, J.J. Ubiquitin-proteasome system involvement in Huntington's disease. *Frontiers in molecular neuroscience* **7**, 77 (2014).
27. Cortes, C.J. & La Spada, A.R. The many faces of autophagy dysfunction in Huntington's disease: from mechanism to therapy. *Drug discovery today* **19**, 963-971 (2014).
28. Tydlacka, S., Wang, C.E., Wang, X., Li, S. & Li, X.J. Differential activities of the ubiquitin-proteasome system in neurons versus glia may account for the preferential accumulation of misfolded proteins in neurons. *J Neurosci* **28**, 13285-13295 (2008).
29. Zhao, T., Hong, Y., Yin, P., Li, S. & Li, X.J. Differential HspBP1 expression accounts for the greater vulnerability of neurons than astrocytes to misfolded proteins. *Proc Natl Acad Sci U S A* **114**, E7803-E7811 (2017).
30. Jansen, A.H., Reits, E.A. & Hol, E.M. The ubiquitin proteasome system in glia and its role in neurodegenerative diseases. *Frontiers in molecular neuroscience* **7**, 73 (2014).
31. Sung, K. & Jimenez-Sanchez, M. Autophagy in Astrocytes and its Implications in Neurodegeneration. *Journal of molecular biology* **432**, 2605-2621 (2020).
32. Koyuncu, S., Fatima, A., Gutierrez-Garcia, R. & Vilchez, D. Proteostasis of Huntingtin in Health and Disease. *International journal of molecular sciences* **18** (2017).
33. Ciechanover, A. & Kwon, Y.T. Protein Quality Control by Molecular Chaperones in Neurodegeneration. *Frontiers in neuroscience* **11**, 185 (2017).
34. San Gil, R., Ooi, L., Yerbury, J.J. & Ecroyd, H. The heat shock response in neurons and astroglia and its role in neurodegenerative diseases. *Molecular neurodegeneration* **12**, 65 (2017).
35. Menalled, L.B., Sison, J.D., Dragatsis, I., Zeitlin, S. & Chesselet, M.F. Time course of early motor and neuropathological anomalies in a knock-in mouse model of Huntington's disease with 140 CAG repeats. *J Comp Neurol* **465**, 11-26 (2003).
36. Colin, A., *et al.* Engineered lentiviral vector targeting astrocytes in vivo. *Glia* **57**, 667-679 (2009).
37. Naldini, L., Blomer, U., Gage, F.H., Trono, D. & Verma, I.M. Efficient transfer, integration, and sustained long-term expression of the transgene in adult rat brains injected with a lentiviral vector. *Proc Natl Acad Sci U S A* **93**, 11382-11388 (1996).
38. Lee, Y., Messing, A., Su, M. & Brenner, M. GFAP promoter elements required for region-specific and astrocyte-specific expression. *Glia* **56**, 481-493 (2008).
39. Ceyzeriat, K., *et al.* Modulation of astrocyte reactivity improves functional deficits in mouse models of Alzheimer's disease. *Acta neuropathologica communications* **6**, 104 (2018).
40. Guillemaud, O., *et al.* Complex roles for reactive astrocytes in the triple transgenic mouse model of Alzheimer disease. *Neurobiol Aging* **90**, 135-146 (2020).
41. de Almeida, L.P., Ross, C.A., Zala, D., Aebischer, P. & Deglon, N. Lentiviral-mediated delivery of mutant huntingtin in the striatum of rats induces a selective neuropathology modulated by polyglutamine repeat size, huntingtin expression levels, and protein length. *J Neurosci* **22**, 3473-3483 (2002).
42. Michels, A.A., Kanon, B., Bensaude, O. & Kampinga, H.H. Heat shock protein (Hsp) 40 mutants inhibit Hsp70 in mammalian cells. *J Biol Chem* **274**, 36757-36763 (1999).
43. Vella, L.J., *et al.* A rigorous method to enrich for exosomes from brain tissue. *Journal of extracellular vesicles* **6**, 1348885 (2017).
44. Kabani, M. & Melki, R. Sup35p in Its Soluble and Prion States Is Packaged inside Extracellular Vesicles. *mBio* **6** (2015).
45. Smyth, G.K. limma: Linear Models for Microarray Data. in *Bioinformatics and Computational Biology Solutions Using R and Bioconductor. Statistics for Biology and Health* (ed. G. R., C. V.J., H. W., I. R.A. & D. S.) (Springer, New York, NY, 2005).
46. Andrews, S. FastQC: A Quality Control Tool for High Throughput Sequence Data. Available online at: <http://www.bioinformatics.babraham.ac.uk/projects/fastqc/> (2010).
47. Kim, D., Langmead, B. & Salzberg, S.L. HISAT: a fast spliced aligner with low memory requirements. *Nature methods* **12**, 357-360 (2015).

48. Liao, Y., Smyth, G.K. & Shi, W. featureCounts: an efficient general purpose program for assigning sequence reads to genomic features. *Bioinformatics* **30**, 923-930 (2014).
49. Love, M.I., Huber, W. & Anders, S. Moderated estimation of fold change and dispersion for RNA-seq data with DESeq2. *Genome Biol* **15**, 550 (2014).
50. Subramanian, A., *et al.* Gene set enrichment analysis: a knowledge-based approach for interpreting genome-wide expression profiles. *Proc Natl Acad Sci U S A* **102**, 15545-15550 (2005).
51. Heinz, S., *et al.* Simple combinations of lineage-determining transcription factors prime cis-regulatory elements required for macrophage and B cell identities. *Molecular cell* **38**, 576-589 (2010).
52. Zambelli, F., Pesole, G. & Pavesi, G. Pscan: finding over-represented transcription factor binding site motifs in sequences from co-regulated or co-expressed genes. *Nucleic Acids Res* **37**, W247-252 (2009).
53. Keenan, A.B., *et al.* ChEA3: transcription factor enrichment analysis by orthogonal omics integration. *Nucleic Acids Res* **47**, W212-W224 (2019).
54. Hickey, M.A., *et al.* Extensive early motor and non-motor behavioral deficits are followed by striatal neuronal loss in knock-in Huntington's disease mice. *Neuroscience* **157**, 280-295 (2008).
55. Escartin, C., *et al.* Reactive astrocyte nomenclature, definitions, and future directions. *Nat Neurosci* **24**, 312-325 (2021).
56. Withana, N.P., *et al.* Labeling of active proteases in fresh-frozen tissues by topical application of quenched activity-based probes. *Nature protocols* **11**, 184-191 (2016).
57. Berkers, C.R., *et al.* Profiling proteasome activity in tissue with fluorescent probes. *Mol Pharm* **4**, 739-748 (2007).
58. Hartl, F.U., Bracher, A. & Hayer-Hartl, M. Molecular chaperones in protein folding and proteostasis. *Nature* **475**, 324-332 (2011).
59. Takeuchi, T., *et al.* Intercellular chaperone transmission via exosomes contributes to maintenance of protein homeostasis at the organismal level. *Proc Natl Acad Sci U S A* **112**, E2497-2506 (2015).
60. Pearce, M.M., Spartz, E.J., Hong, W., Luo, L. & Kopito, R.R. Prion-like transmission of neuronal huntingtin aggregates to phagocytic glia in the Drosophila brain. *Nature communications* **6**, 6768 (2015).
61. Pecho-Vrieseling, E., *et al.* Transneuronal propagation of mutant huntingtin contributes to non-cell autonomous pathology in neurons. *Nat Neurosci* **17**, 1064-1072 (2014).
62. Babcock, D.T. & Ganetzky, B. Transcellular spreading of huntingtin aggregates in the Drosophila brain. *Proc Natl Acad Sci U S A* **112**, E5427-5433 (2015).
63. Donnelly, K.M., *et al.* Phagocytic glia are obligatory intermediates in transmission of mutant huntingtin aggregates across neuronal synapses. *Elife* **9** (2020).
64. Cicchetti, F., *et al.* Mutant huntingtin is present in neuronal grafts in Huntington disease patients. *Ann Neurol* **76**, 31-42 (2014).
65. Diaz-Hidalgo, L., *et al.* Transglutaminase type 2-dependent selective recruitment of proteins into exosomes under stressful cellular conditions. *Biochim Biophys Acta* **1863**, 2084-2092 (2016).
66. Jeon, I., *et al.* Human-to-mouse prion-like propagation of mutant huntingtin protein. *Acta Neuropathol* **132**, 577-592 (2016).
67. Costanzo, M., *et al.* Transfer of polyglutamine aggregates in neuronal cells occurs in tunneling nanotubes. *J Cell Sci* **126**, 3678-3685 (2013).
68. Trajkovic, K., Jeong, H. & Krainc, D. Mutant Huntingtin Is Secreted via a Late Endosomal/Lysosomal Unconventional Secretory Pathway. *J Neurosci* **37**, 9000-9012 (2017).
69. Kampinga, H.H. & Craig, E.A. The HSP70 chaperone machinery: J proteins as drivers of functional specificity. *Nature reviews. Molecular cell biology* **11**, 579-592 (2010).
70. Scior, A., *et al.* Complete suppression of Htt fibrilization and disaggregation of Htt fibrils by a trimeric chaperone complex. *EMBO J* **37**, 282-299 (2018).
71. Wentink, A.S., *et al.* Molecular dissection of amyloid disaggregation by human HSP70. *Nature* **587**, 483-488 (2020).
72. Popiel, H.A., *et al.* Hsp40 gene therapy exerts therapeutic effects on polyglutamine disease mice via a non-cell autonomous mechanism. *PLoS One* **7**, e51069 (2012).

73. Warrick, J.M., *et al.* Suppression of polyglutamine-mediated neurodegeneration in *Drosophila* by the molecular chaperone HSP70. *Nature genetics* **23**, 425-428 (1999).
74. Bason, M., *et al.* Astrocytic expression of the chaperone DNAJB6 results in non-cell autonomous protection in Huntington's disease. *Neurobiol Dis* **124**, 108-117 (2019).
75. Arrasate, M. & Finkbeiner, S. Protein aggregates in Huntington's disease. *Exp Neurol* **238**, 1-11 (2012).
76. Ramdzan, Y.M., *et al.* Huntingtin Inclusions Trigger Cellular Quiescence, Deactivate Apoptosis, and Lead to Delayed Necrosis. *Cell reports* **19**, 919-927 (2017).
77. Pircs, K., *et al.* Huntingtin Aggregation Impairs Autophagy, Leading to Argonaute-2 Accumulation and Global MicroRNA Dysregulation. *Cell reports* **24**, 1397-1406 (2018).
